# Supplementary material
Source: PubMed Central journal article supplement (PMC4806185)
Supplement: mmc1.pdf [file mmc1.pdf]

## Supporting Material

### *Direct Calculation of Protein Fitness Landscapes through Computational Protein Design*

L. Au and D. F. Green, 2015

**Note:** Residue positions in all figures are listed alpha-numerically with the protein chain (A, B, and G for the  $\alpha$ -,  $\beta$ - and  $\gamma$ -subunits, respectively), followed by the position number according to the PDB file, and a single-letter code for the wild-type amino acid. Histidine states may be singly protonated at  $\delta$ - or  $\varepsilon$ -nitrogens and are listed with lower-case ‘d’ (or H $\delta$ ) and ‘e’ (or H $\varepsilon$ ), respectively; when it is doubly protonated, we indicate this with lower-case ‘p’ or with H $^+$ .

## List of Figures

|            |                                                                                                                              |    |
|------------|------------------------------------------------------------------------------------------------------------------------------|----|
| <b>S1</b>  | Implementation of DEE/A* protocol . . . . .                                                                                  | 4  |
| <b>S2</b>  | Removing sequences to determine neutrality . . . . .                                                                         | 5  |
| <b>S3</b>  | Effect of changing $\varepsilon_{cut}$ in defining neutrality . . . . .                                                      | 5  |
| <b>S4</b>  | Structural examples for calibrating effective energy . . . . .                                                               | 6  |
| <b>S5</b>  | G $\alpha$ mutations: stability relative to wild type, $\langle \Delta\Delta G_{fold} \rangle$ . . . . .                     | 9  |
| <b>S6</b>  | G $\beta\gamma$ -heterodimer: stability relative to wild type, $\langle \Delta\Delta G_{fold} \rangle$ . . . . .             | 10 |
| <b>S7</b>  | G $\alpha$ mutations: binding relative to wild type, $\langle \Delta\Delta G_{bind} \rangle$ . . . . .                       | 11 |
| <b>S8</b>  | G $\beta\gamma$ -heterodimer: binding relative to wild type, $\langle \Delta\Delta G_{bind} \rangle$ . . . . .               | 12 |
| <b>S9</b>  | Residues at G $\alpha$ -G $\beta\gamma$ binding interface . . . . .                                                          | 13 |
| <b>S10</b> | G $\alpha$ -subunit: $\max(\langle \Delta\Delta G_{fold} \rangle, \langle \Delta\Delta G_{bind} \rangle)$ . . . . .          | 14 |
| <b>S11</b> | G $\beta\gamma$ -heterodimer: $\max(\langle \Delta\Delta G_{fold} \rangle, \langle \Delta\Delta G_{bind} \rangle)$ . . . . . | 15 |
| <b>S12</b> | Distribution of unconverged states . . . . .                                                                                 | 17 |
| <b>S13</b> | Convergence in G $\alpha$ , $\langle \Delta\Delta G_{fold} \rangle$ . . . . .                                                | 18 |
| <b>S14</b> | Convergence in G $\beta\gamma$ , $\langle \Delta\Delta G_{fold} \rangle$ . . . . .                                           | 19 |
| <b>S15</b> | Correlation between energy minimization and DEE/A* . . . . .                                                                 | 20 |
| <b>S16</b> | Energetic differences between DEE/A* and minimization . . . . .                                                              | 20 |
| <b>S17</b> | Disparity between DEE/A* and minimization routines . . . . .                                                                 | 21 |
| <b>S18</b> | Amino-acid frequency of occurrence for wild-type heterotrimer. . . . .                                                       | 23 |
| <b>S19</b> | DEE/A* and PAM120 $e_{ij}$ values. . . . .                                                                                   | 24 |
| <b>S20</b> | DEE/A* and BLOSUM62 $e_{ij}$ values . . . . .                                                                                | 25 |
| <b>S21</b> | Randomized matrices and DEE/A* . . . . .                                                                                     | 26 |
| <b>S22</b> | Comparing substitution rates between random samples and DEE/A* . . . . .                                                     | 27 |
| <b>S23</b> | Correlation between DEE/A* and thermal stability for alanine scanning . . . . .                                              | 29 |
| <b>S24</b> | Proportion of positive and negative outcomes in alanine scanning . . . . .                                                   | 30 |
| <b>S25</b> | Computed $p$ -values for all positions . . . . .                                                                             | 33 |

## List of Tables

|            |                                                                                                         |    |
|------------|---------------------------------------------------------------------------------------------------------|----|
| <b>S1</b>  | Salt bridge: $G\alpha D20-G\beta R52$ , $\Delta\Delta G_{bind}$ mutations . . . . .                     | 6  |
| <b>S2</b>  | Salt bridge: $G\alpha E216-G\beta K57$ , $\Delta\Delta G_{bind}$ mutations . . . . .                    | 6  |
| <b>S3</b>  | Hydrogen-bond network: $G\beta R68-G\beta D83-G\beta T86$ , $\Delta\Delta G_{bind}$ mutations . . . . . | 7  |
| <b>S4</b>  | Intervals for conformational subsets . . . . .                                                          | 16 |
| <b>S5</b>  | Comparison of DEE/ $A^*$ and random data . . . . .                                                      | 27 |
| <b>S6</b>  | Comparing permuted and original matrices . . . . .                                                      | 28 |
| <b>S7</b>  | Contingency table: DEE/ $A^*$ comparison with thermal stability . . . . .                               | 29 |
| <b>S8</b>  | Contingency table: randomized DEE/ $A^*$ compared with thermal stability. . . . .                       | 30 |
| <b>S9</b>  | List of point mutations for $G\beta$ . . . . .                                                          | 32 |
| <b>S10</b> | List of positions with known binding interactions. . . . .                                              | 34 |
| <b>S11</b> | List of positions predicted to make significant binding contributions . . . . .                         | 35 |

## 1 **1 Overview of computational protocol**

2 A molecular dynamics simulation was performed on  $G\alpha_{i1}\beta_1\gamma_2$ , and protein conformations  
3 were taken from 50-ns intervals over a 350-ns trajectory; a total of 40 snapshots were used in  
4 our analysis (5 conformations from each interval,) as shown in **Fig. S1**. Every position in a  
5 given protein conformation is mutated to each of the naturally occurring amino acids, except  
6 proline and glycine, and the rotamers that are incompatible with a low-energy conformation  
7 for a given sequence are discarded. From the remaining rotamer choices, the global minimum  
8 energy conformation and additional structures within a designated energy cutoff from it are  
9 identified. We have chosen a 30-kcal/mol cutoff for this, and have found that over 90% of  
10 all possible single-site mutations satisfy this constraint.

## 11 **2 Neutral mutations defined by energetic landscape**

12 Neutral mutations, those that neither worsen nor improve fitness, were defined based on  
13 the distribution of  $\Delta\Delta G_{fold}$  and  $\Delta\Delta G_{bind}$  on the energy landscape, after referencing to  
14 the wild-type sequence; the proportion of mutant sequences was highest around the origin,  
15 suggesting that most mutations have a neutral effect. Sequences simultaneously sharing  
16  $\Delta\Delta G_{fold}$  and  $\Delta\Delta G_{bind}$  within a designated energy cutoff,  $\varepsilon_{cut}$ , were removed from the data  
17 set (e.g.  $|\Delta\Delta G_{fold}| \leq \varepsilon_{cut}$  and  $|\Delta\Delta G_{bind}| \leq \varepsilon_{cut}$ ) (**Fig. S2**). The proportion of remaining  
18 sequences was calculated for various energy cutoffs, and compared. At the 1.5-kcal/mol  
19 cutoff, a significant reduction in sequence space is observed, and thus taken as the energetic  
20 cutoff for defining neutrality (**Fig. S3**).

## 21 **3 Effective temperature for DEE/A\***

22 A Boltzmann-weighted average was computed for each mutation over all 40 snapshots, and  
23 an effective temperature for the distribution is necessary to rescale computed results so  
24 that the values could better reflect energetic changes due to conformational entropy. A  
25 number of temperatures were tested to gauge the compatibility between structures found  
26 and their computed energies; we focused on energetic changes after mutation at salt-bridges  
27 and hydrogen bonds to set a baseline (**Fig. S4**).

28 Most hydrogen bonds, involving nitrogen and oxygen, are expected to have  $\sim 2$ – $7$   
29 kcal/mol each, and we used this as a guideline to compare our calculations for specific  
30 mutations at different temperatures (**Tables S1–S3**). Our goal was to identify a temperature  
31 at which the loss or gain of hydrogen bonds would fall within the 2–7 kcal/mol interval, and  
32 the lowest energy that achieves this is at 4500K.

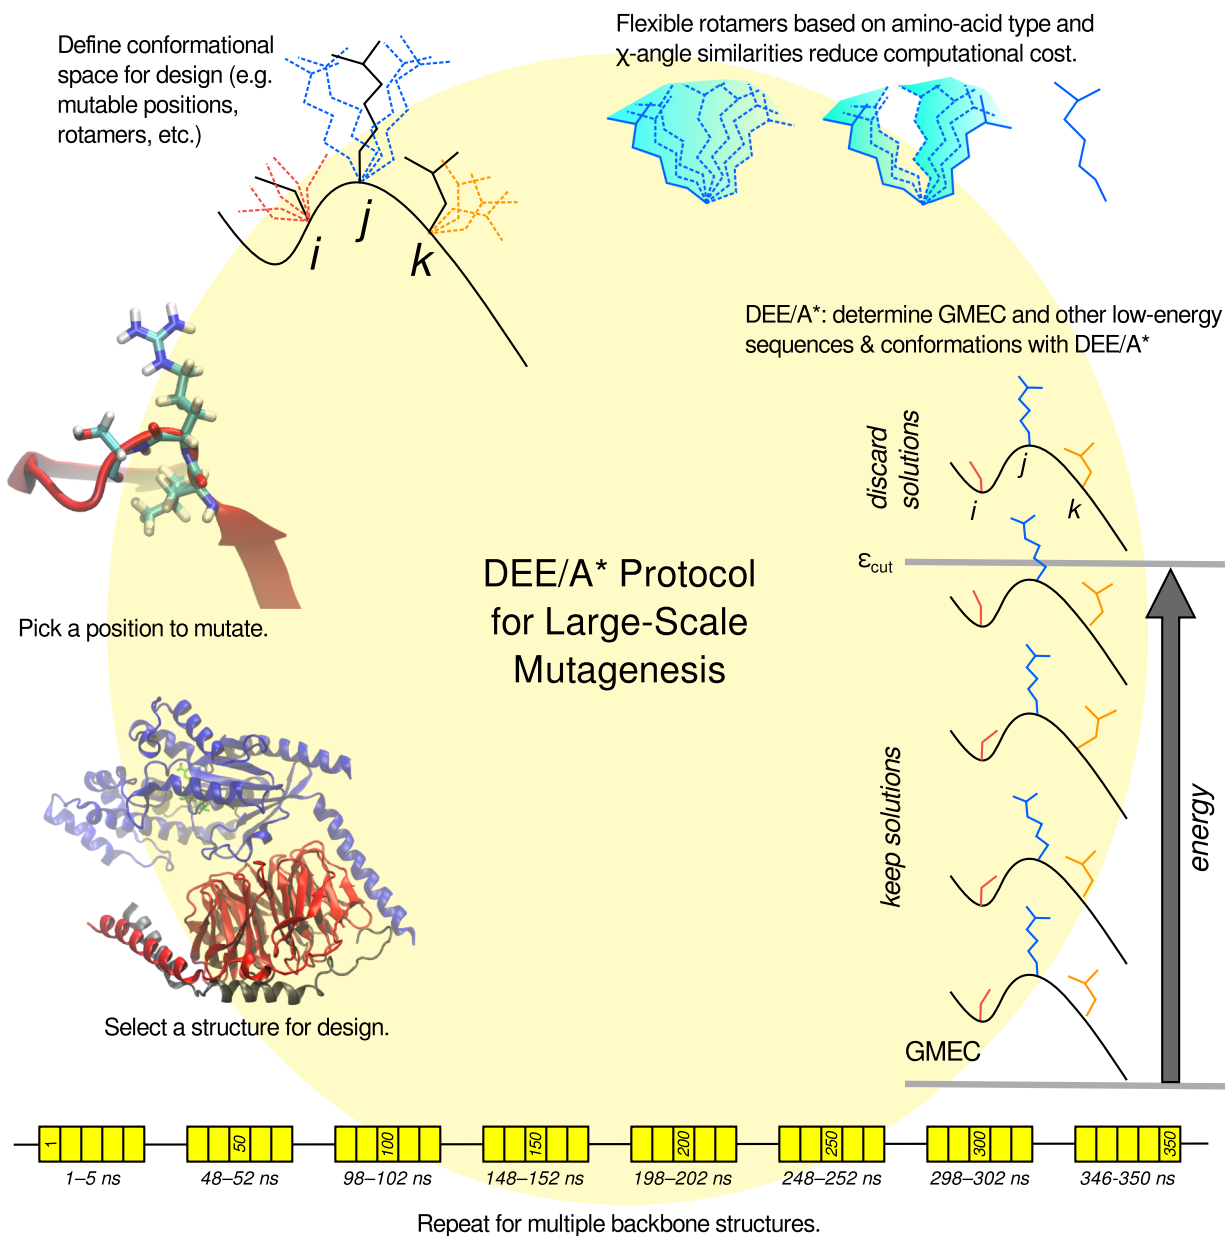

**Figure S1:** (Main-text figure 1b.) Representative protein backbones are mutated systematically until low-energy sequences within  $\epsilon_{cut}$  and their corresponding conformations are found.

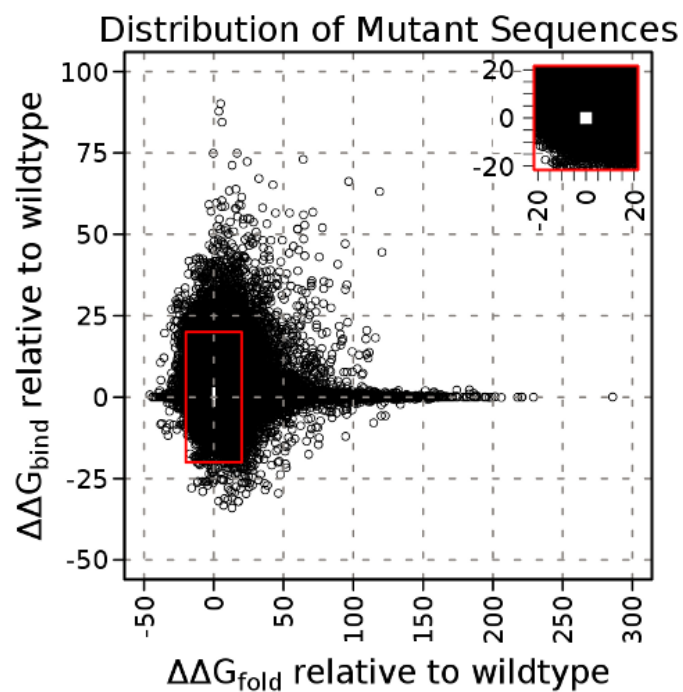

**Figure S2:** Sequences within 1.5 kcal/mol of  $\Delta\Delta G_{fold}$  and  $\Delta\Delta G_{bind}$ , based on absolute value, removed.

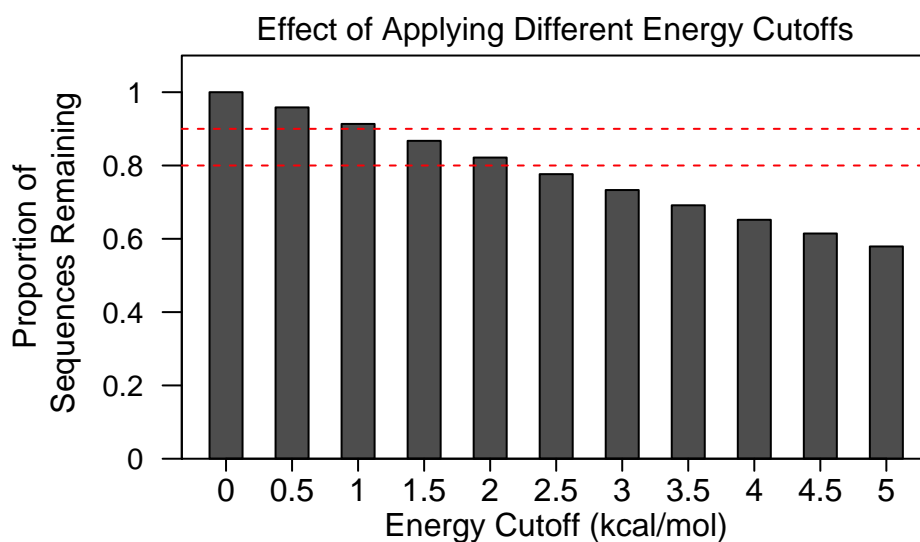

**Figure S3:** The proportion of sequences remaining after removing neutral sequences, defined by different  $\epsilon_{cut}$ , is shown.

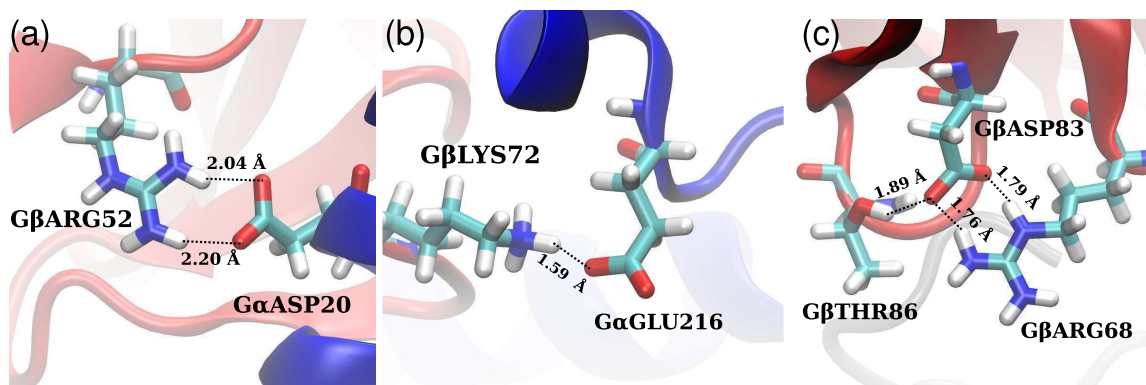

**Figure S4:** Temperature for effective energy was based on well-established intermolecular interactions: (a) doubly-bonded salt bridge,  $G\alpha D20$ – $G\beta R52$ , (b) singly-bonded salt bridge,  $G\alpha E216$ – $G\beta K57$ , and (c) a hydrogen-bond network between  $G\beta R68$ – $G\beta E83$ – $G\beta T86$

**Table S1:**  $\langle \Delta \Delta G_{bind} \rangle$  in kcal/mol for select mutations at  $G\alpha D20$ – $G\beta R52$  salt bridge.

| Temp. (K) | $G\alpha D20A$ | $G\alpha D20E$  | $G\alpha D20N$ | $G\alpha D20Q$ | $G\beta R52A$ | $G\beta R52K$ |
|-----------|----------------|-----------------|----------------|----------------|---------------|---------------|
| 300       | $-1.5 \pm 0.2$ | $-13.1 \pm 2.0$ | $-4.8 \pm 0.7$ | $-7.2 \pm 0.9$ | $5.2 \pm 1.0$ | $0.0 \pm 0.0$ |
| 1500      | $-0.2 \pm 0.1$ | $-10.4 \pm 1.0$ | $-2.9 \pm 0.4$ | $-5.6 \pm 0.5$ | $1.8 \pm 0.4$ | $1.3 \pm 0.1$ |
| 3000      | $2.1 \pm 0.1$  | $-6.7 \pm 0.5$  | $0.4 \pm 0.2$  | $-2.6 \pm 0.3$ | $2.2 \pm 0.2$ | $1.8 \pm 0.1$ |
| 4500      | $3.3 \pm 0.1$  | $-4.6 \pm 0.3$  | $1.9 \pm 0.2$  | $-1.1 \pm 0.2$ | $2.4 \pm 0.1$ | $2.0 \pm 0.1$ |
| 6000      | $4.0 \pm 0.2$  | $-3.5 \pm 0.3$  | $2.7 \pm 0.2$  | $-0.3 \pm 0.2$ | $2.6 \pm 0.1$ | $2.2 \pm 0.1$ |
| 9000      | $4.9 \pm 0.2$  | $-2.4 \pm 0.2$  | $3.6 \pm 0.2$  | $0.7 \pm 0.2$  | $2.7 \pm 0.1$ | $2.5 \pm 0.1$ |
| 300,000   | $7.7 \pm 0.3$  | $0.3 \pm 0.3$   | $6.3 \pm 0.3$  | $3.3 \pm 0.3$  | $3.0 \pm 0.1$ | $3.2 \pm 0.1$ |

**Table S2:**  $\langle \Delta \Delta G_{bind} \rangle$  in kcal/mol for select mutations at  $G\alpha E216$ – $G\beta K57$  salt bridge.

| Temp. (K) | $G\alpha E216A$ | $G\alpha E216D$ | $G\alpha E216N$ | $G\alpha E216Q$ | $G\beta K57A$  | $G\beta K57R$   |
|-----------|-----------------|-----------------|-----------------|-----------------|----------------|-----------------|
| 300       | $2.0 \pm 0.3$   | $-2.6 \pm 0.4$  | $-8.7 \pm 1.4$  | $-7.6 \pm 1.1$  | $-8.0 \pm 1.3$ | $-10.2 \pm 1.6$ |
| 1500      | $1.2 \pm 0.3$   | $-0.7 \pm 0.1$  | $-4.5 \pm 0.7$  | $-7.0 \pm 0.5$  | $-8.0 \pm 1.3$ | $-10.2 \pm 1.6$ |
| 3000      | $1.1 \pm 0.2$   | $1.3 \pm 0.1$   | $-1.5 \pm 0.3$  | $-5.0 \pm 0.2$  | $-7.9 \pm 1.3$ | $-10.0 \pm 1.6$ |
| 4500      | $1.9 \pm 0.1$   | $2.3 \pm 0.1$   | $-0.2 \pm 0.2$  | $-4.2 \pm 0.2$  | $-6.4 \pm 1.1$ | $-7.8 \pm 1.3$  |
| 6000      | $2.4 \pm 0.1$   | $2.8 \pm 0.1$   | $0.5 \pm 0.2$   | $-3.8 \pm 0.1$  | $-3.1 \pm 0.8$ | $-4.4 \pm 0.9$  |
| 9000      | $2.9 \pm 0.1$   | $3.3 \pm 0.1$   | $1.2 \pm 0.1$   | $-3.3 \pm 0.1$  | $2.3 \pm 0.4$  | $-0.3 \pm 0.4$  |
| 300,000   | $3.9 \pm 0.1$   | $4.4 \pm 0.1$   | $2.4 \pm 0.1$   | $-2.5 \pm 0.1$  | $8.0 \pm 0.1$  | $4.6 \pm 0.2$   |

**Table S3:**  $\langle \Delta \Delta G_{bind} \rangle$  for select mutations in the hydrogen-bond network

| Temp. (K) | $G\beta$ R68A  | $G\beta$ R68K  |                |                |
|-----------|----------------|----------------|----------------|----------------|
| 300       | $9.3 \pm 1.3$  | $-2.9 \pm 0.4$ |                |                |
| 1500      | $3.7 \pm 0.4$  | $-1.4 \pm 0.3$ |                |                |
| 3000      | $3.1 \pm 0.2$  | $-0.1 \pm 0.2$ |                |                |
| 4500      | $3.2 \pm 0.2$  | $0.6 \pm 0.1$  |                |                |
| 6000      | $3.3 \pm 0.2$  | $1.0 \pm 0.1$  |                |                |
| 9000      | $3.4 \pm 0.2$  | $1.4 \pm 0.1$  |                |                |
| 300,000   | $3.8 \pm 0.1$  | $2.3 \pm 0.1$  |                |                |
|           | $G\beta$ D83A  | $G\beta$ D83E  | $G\beta$ D83N  | $G\beta$ D83Q  |
| 300       | $-5.3 \pm 0.9$ | $-1.5 \pm 0.2$ | $-4.3 \pm 0.7$ | $-5.3 \pm 0.8$ |
| 1500      | $-4.3 \pm 0.6$ | $2.8 \pm 0.3$  | $-3.2 \pm 0.4$ | $-3.1 \pm 0.6$ |
| 3000      | $-1.8 \pm 0.3$ | $4.2 \pm 0.2$  | $-1.4 \pm 0.3$ | $-1.0 \pm 0.3$ |
| 4500      | $-0.1 \pm 0.2$ | $4.8 \pm 0.2$  | $0.0 \pm 0.2$  | $0.3 \pm 0.2$  |
| 6000      | $0.8 \pm 0.2$  | $5.1 \pm 0.2$  | $0.9 \pm 0.1$  | $1.0 \pm 0.2$  |
| 9000      | $1.8 \pm 0.1$  | $5.7 \pm 0.2$  | $1.9 \pm 0.1$  | $1.9 \pm 0.2$  |
| 300,000   | $3.5 \pm 0.2$  | $7.1 \pm 0.2$  | $4.0 \pm 0.2$  | $3.8 \pm 0.2$  |
|           | $G\beta$ T86A  | $G\beta$ T86S  | $G\beta$ T86C  |                |
| 300       | $-3.1 \pm 0.5$ | $-2.1 \pm 0.3$ | $-3.0 \pm 0.3$ |                |
| 1500      | $-1.1 \pm 0.2$ | $-0.5 \pm 0.1$ | $-2.2 \pm 0.2$ |                |
| 3000      | $0.3 \pm 0.1$  | $0.1 \pm 0.1$  | $-0.9 \pm 0.1$ |                |
| 4500      | $0.9 \pm 0.1$  | $0.3 \pm 0.1$  | $-0.3 \pm 0.1$ |                |
| 6000      | $1.2 \pm 0.1$  | $0.5 \pm 0.1$  | $0.0 \pm 0.1$  |                |
| 9000      | $1.5 \pm 0.1$  | $0.8 \pm 0.1$  | $0.4 \pm 0.1$  |                |
| 300,000   | $2.5 \pm 0.1$  | $1.9 \pm 0.1$  | $1.4 \pm 0.1$  |                |

## 33 4 Complete mutation profiles for $G\alpha_{i1}\beta_1\gamma_2$

34 For each mutant sequence, the energetic difference relative to wild type is computed over  
35 an ensemble of states using backbone structures from the 40 chosen conformations, and an  
36 effective temperature of 4500 K was used to compute a Boltzmann-weighted average over  
37 them for each sequence. Energy profiles for each subunit of the heterotrimer were compiled  
38 to identify regions of high and low mutational sensitivity. These energetic changes due to  
39 mutation are shown with secondary structure for:

- 40 • Stability ( $\langle\Delta\Delta G_{fold}\rangle$ ) of  $G\alpha$  in context of a complete heterotrimer (**Fig. S5**).
- 41 • Stability ( $\langle\Delta\Delta G_{bind}\rangle$ ) of  $\beta\gamma$ -heterodimer in context of a complete heterotrimer  
42 (**Fig. S6**).
- 43 • Binding interactions ( $\langle\Delta\Delta G_{bind}\rangle$ ) of  $G\alpha$  to  $\beta\gamma$ -heterodimer (**Fig. S7**).
- 44 • Binding interactions ( $\langle\Delta\Delta G_{bind}\rangle$ ) of  $\beta\gamma$  to the  $\alpha$  subunit (**Fig. S8**).
- 45 • Residues involved in binding that show significant energetic variation (**Fig. S9**).
- 46 • Maximum of either stability or binding in each  $G\alpha$  mutant (**Fig. S10**).
- 47 • Maximum of either stability or binding in each  $\beta\gamma$ -heterodimer mutant (**Fig. S11**).



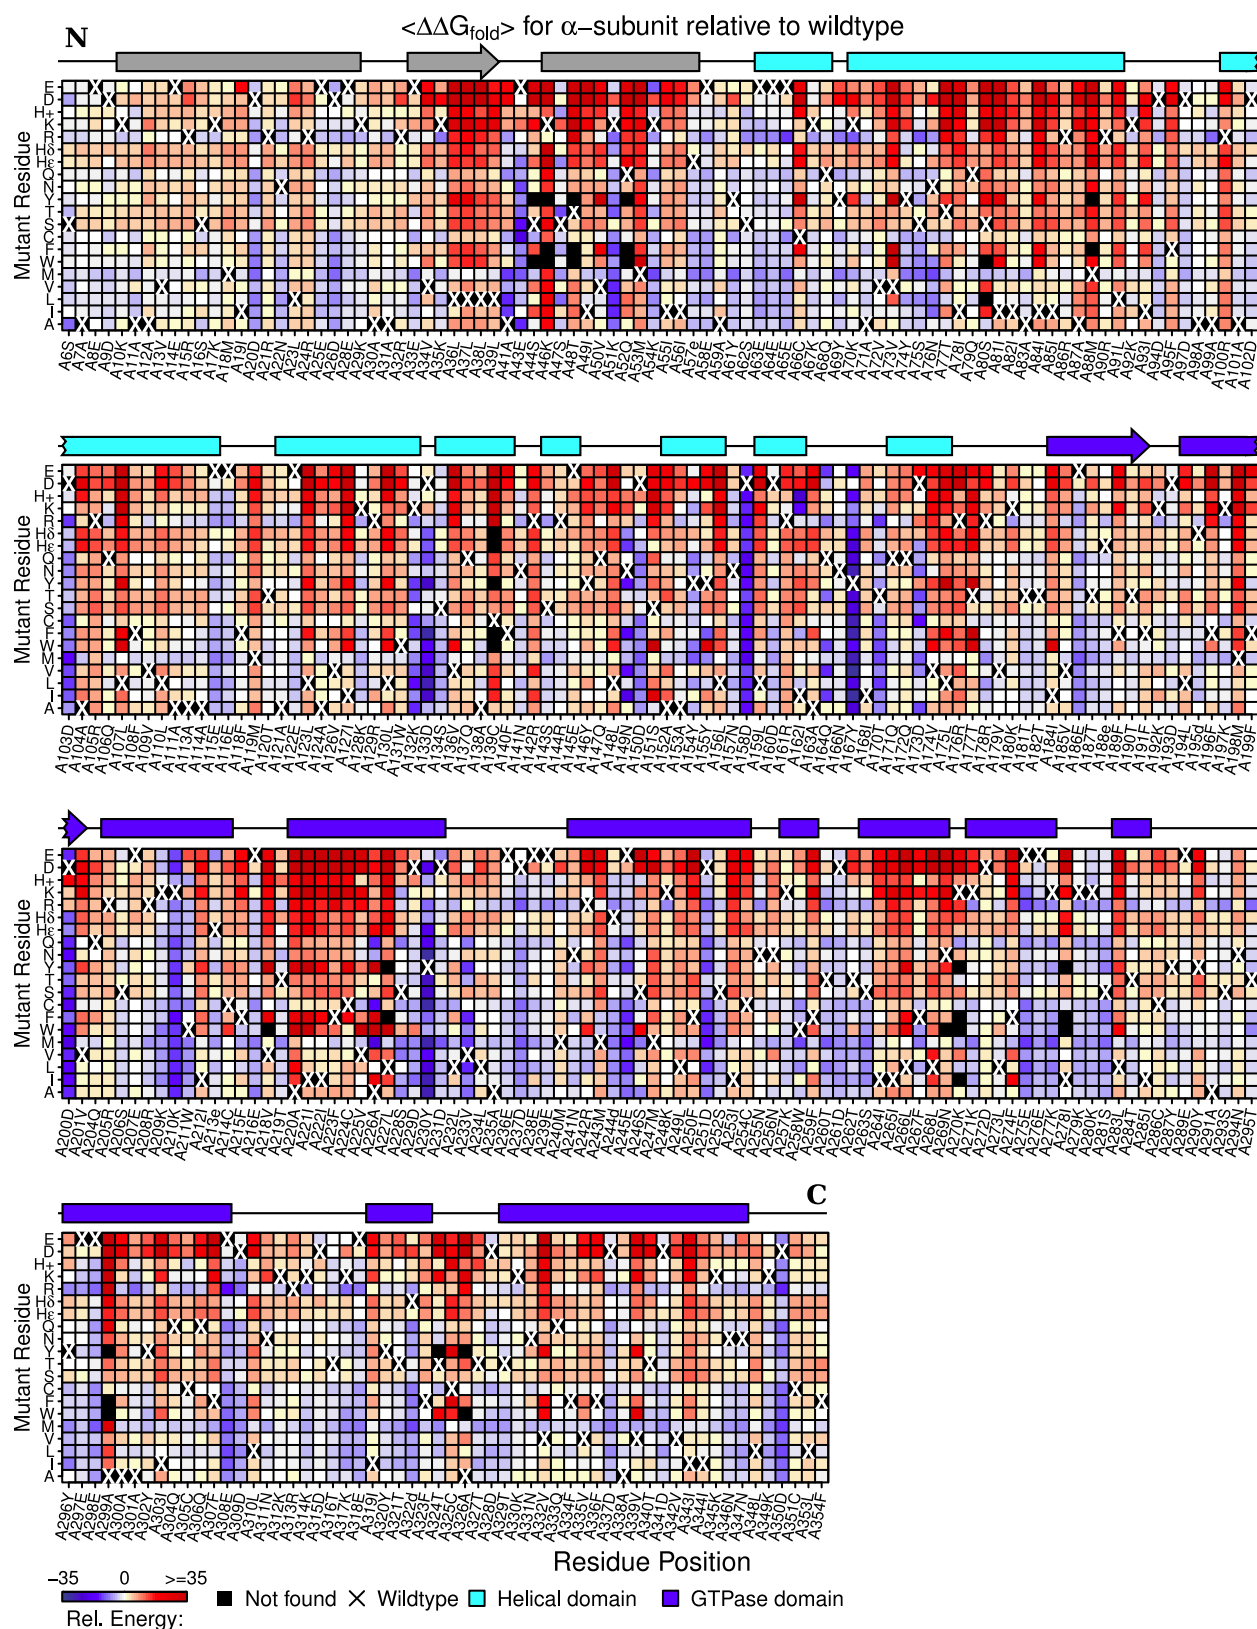

**Figure S5:** Stability ( $\langle \Delta\Delta G_{fold} \rangle$ ) of  $G\alpha$  sequences are organized according to position in the subunit and mutations are arranged according to amino-acid properties. The energy of each mutant (in kcal/mol) is referenced to the wild-type structure prior to averaging over the ensemble of states.

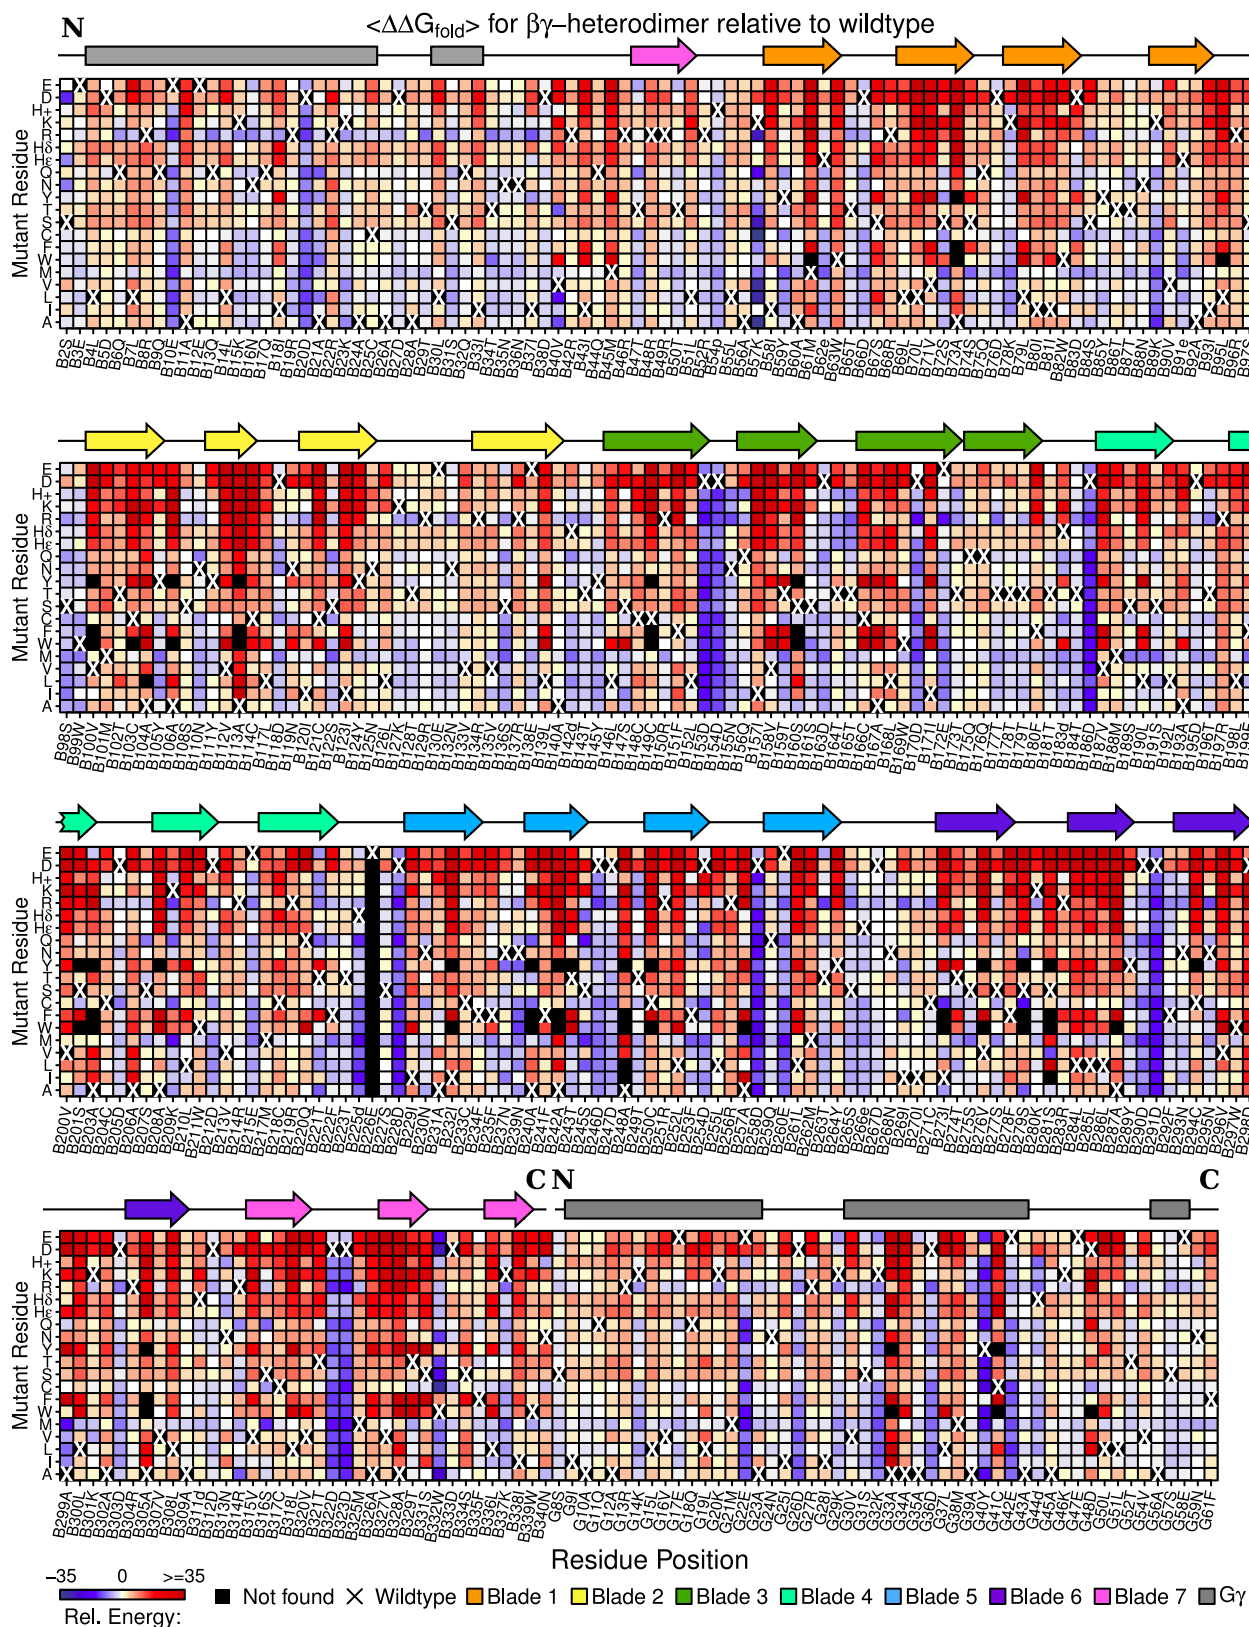

**Figure S6:** Stability ( $\langle \Delta \Delta G_{fold} \rangle$ ) for the complete heterodimer is separated according to protein chain:  $G\beta$  is organized in repeating propeller blades, indicated by secondary structure illustrations, and  $G\gamma$  follows. Wild-type amino acids are distinguished from mutations for reference, and mutant amino acids are ordered according to side-chain properties; favorable (blue) and unfavorable substitutions (red) can be identified quickly from this subset of protein sequence space.

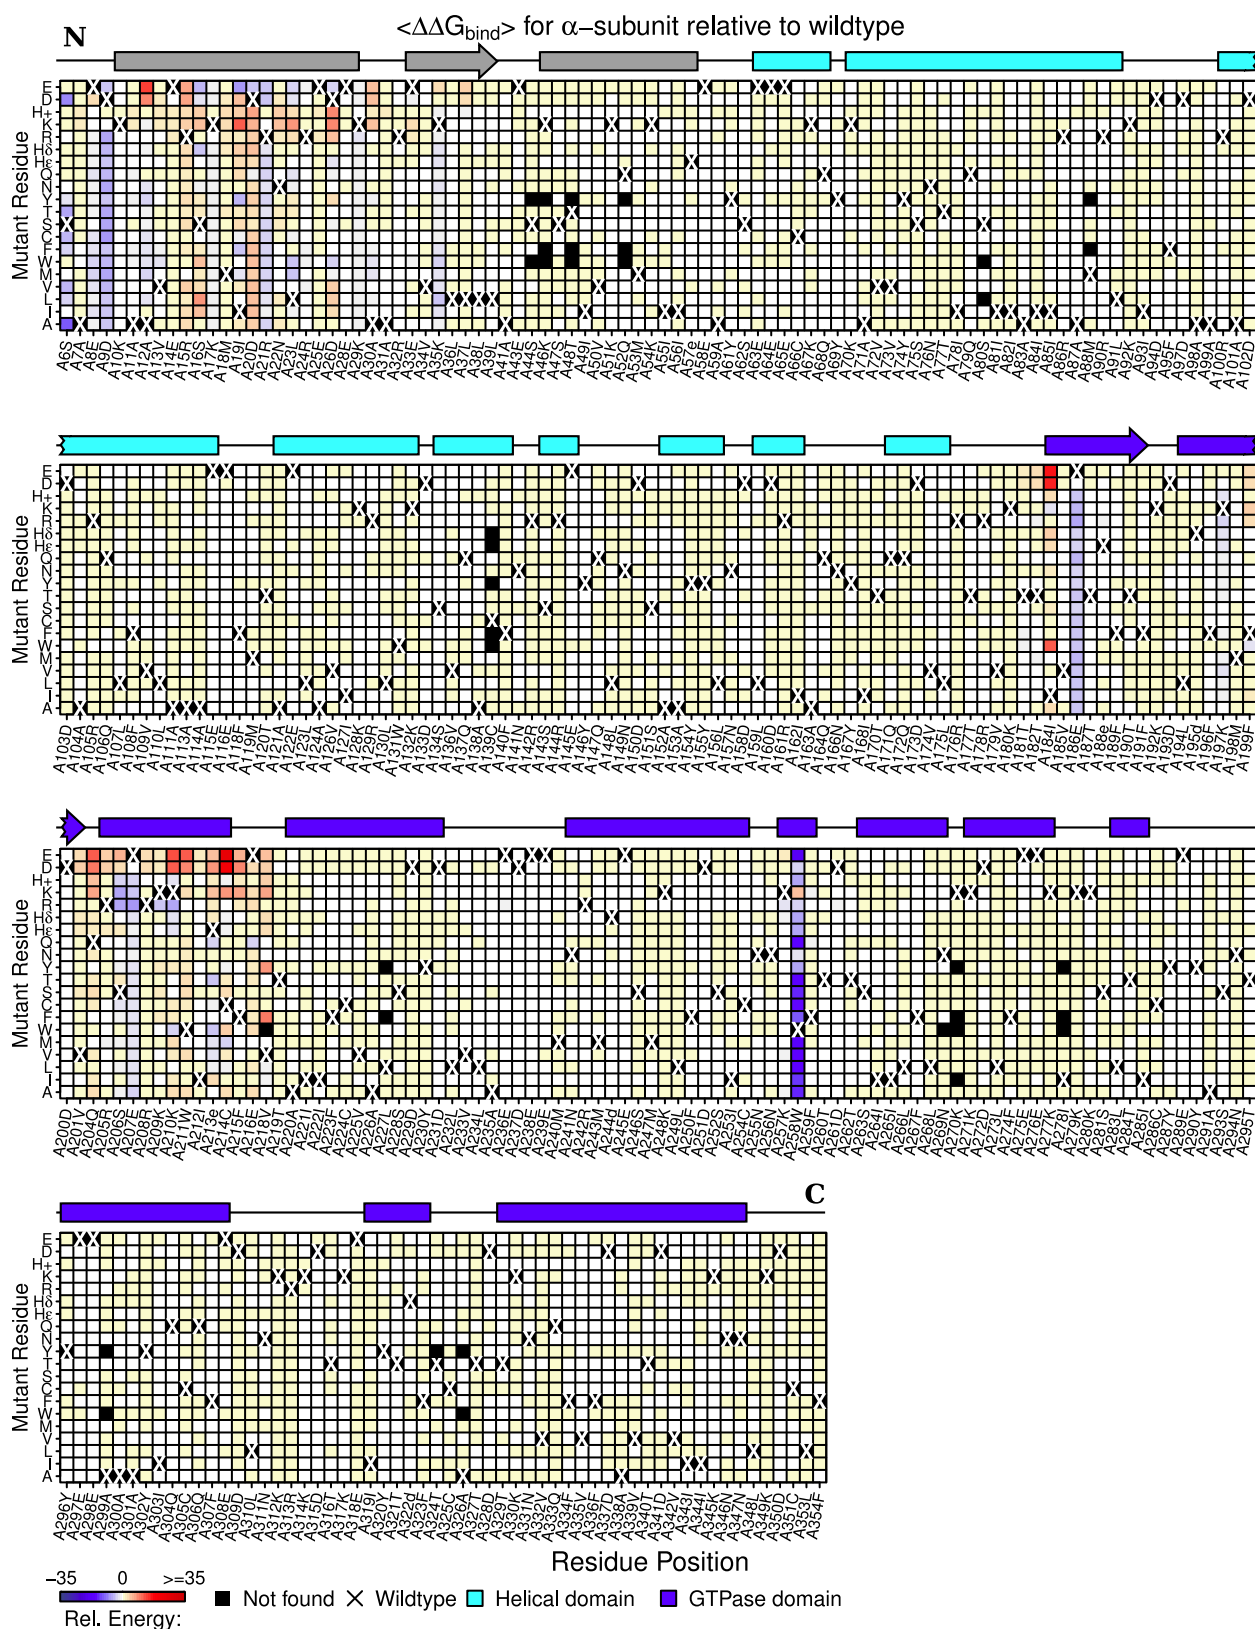

**Figure S7:** Average energy referenced to wild type is shown here for  $\Delta\Delta G_{bind}$  for the  $\alpha$ -subunit, based on how it binds to the  $\beta\gamma$ -heterodimer. Most mutations have a neutral effect, hence the profile is largely dominated by yellow tones.

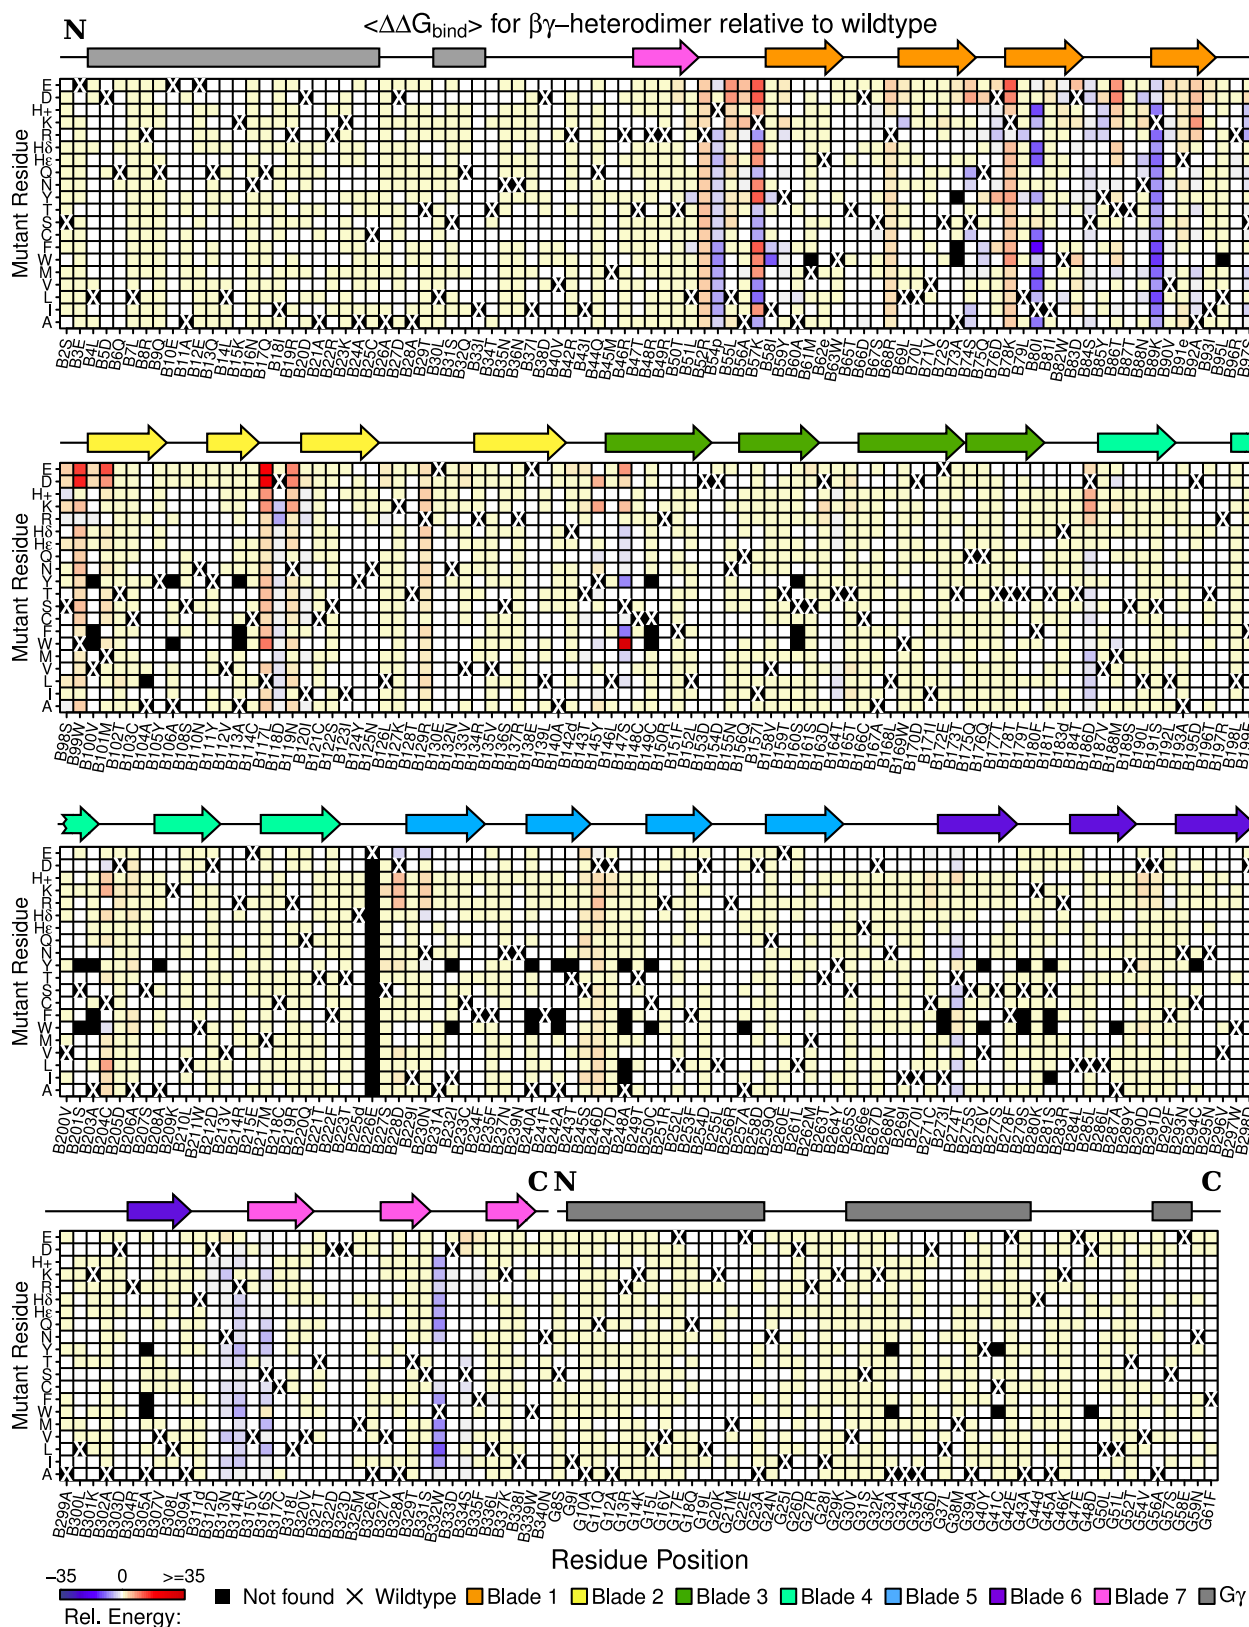

**Figure S8:** Average energy referenced to wild type is shown here for  $\Delta \Delta G_{bind}$  for the  $\beta\gamma$ -heterodimer, based on its binding interactions with  $G\alpha$ . Most mutations have a neutral effect, as indicated by the yellow tones.

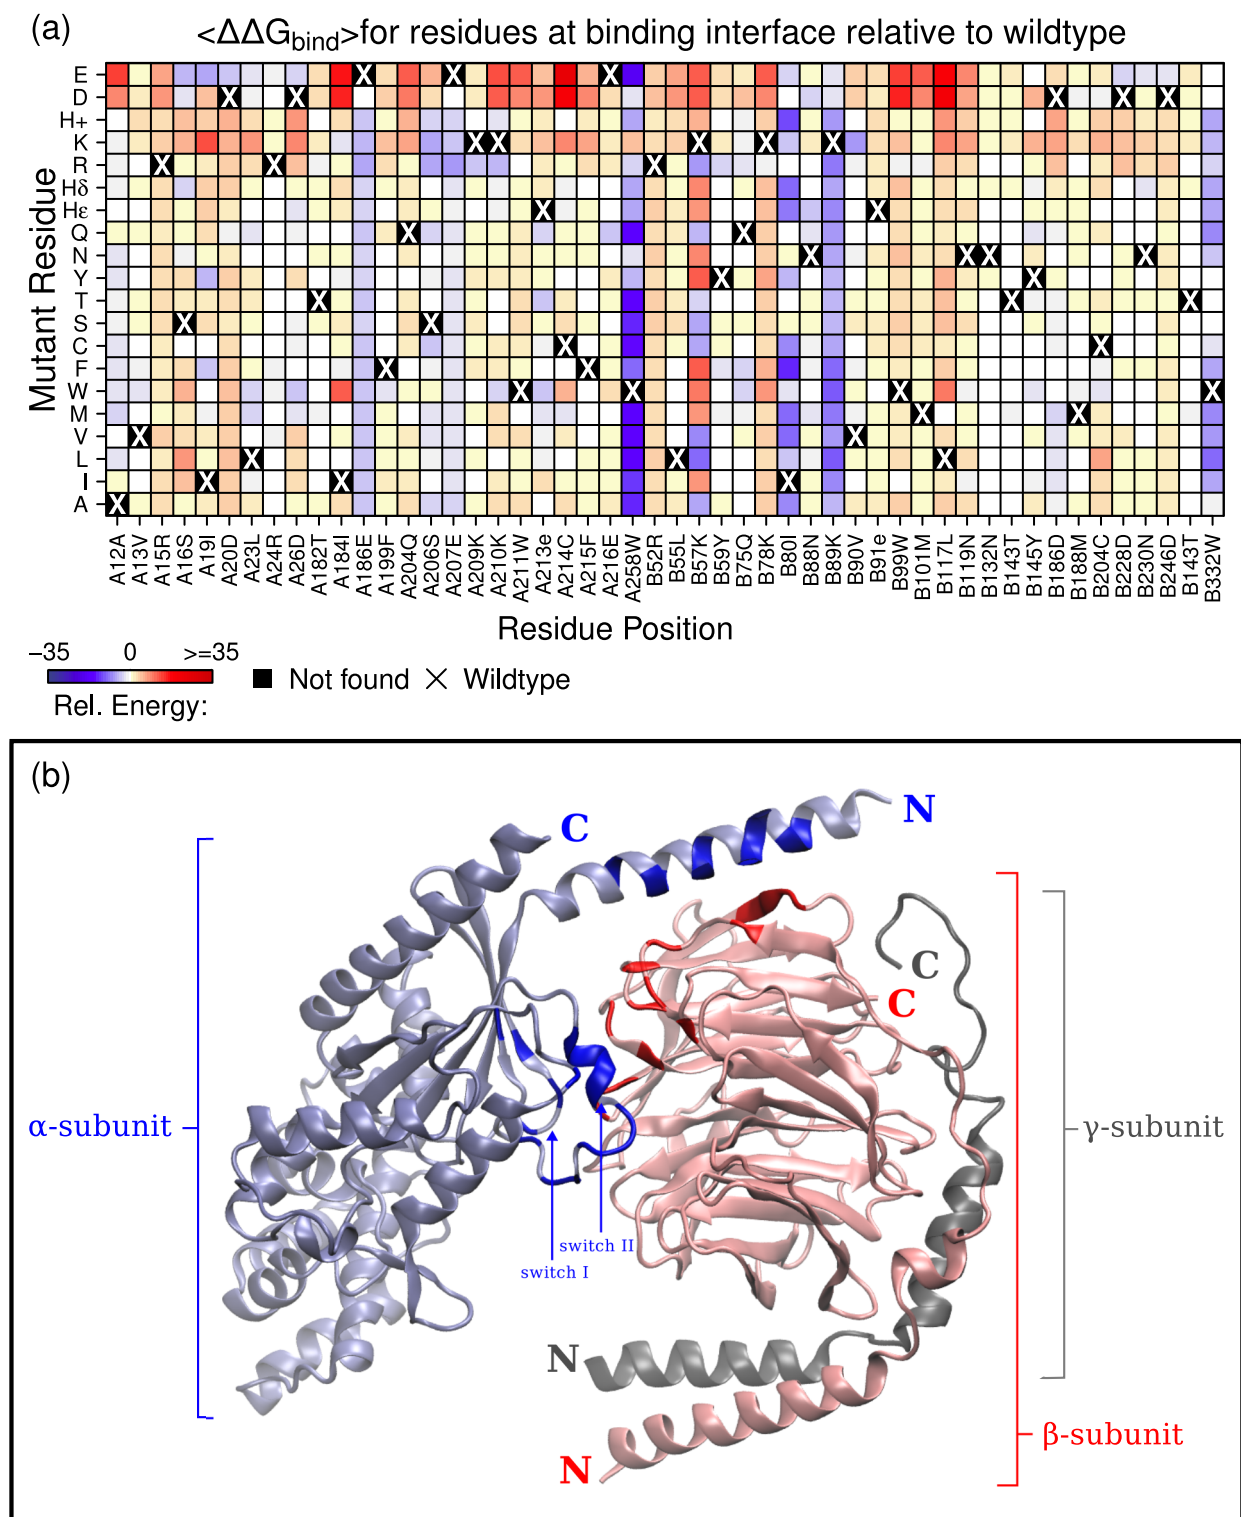

**Figure S9:** Most positions show no change in binding energy after mutation. (a) Here, the subset of positions with noticeable energetic variation are shown. (b) Structurally, these positions correspond well with the switch II region and amino terminus of  $G\alpha$ , both of which are known to bind with the  $\beta\gamma$ -heterodimer. Residues involved in binding according to (a) are shown in blue or red, superimposed onto the light blue-gray and light red subunits of the heterotrimer.

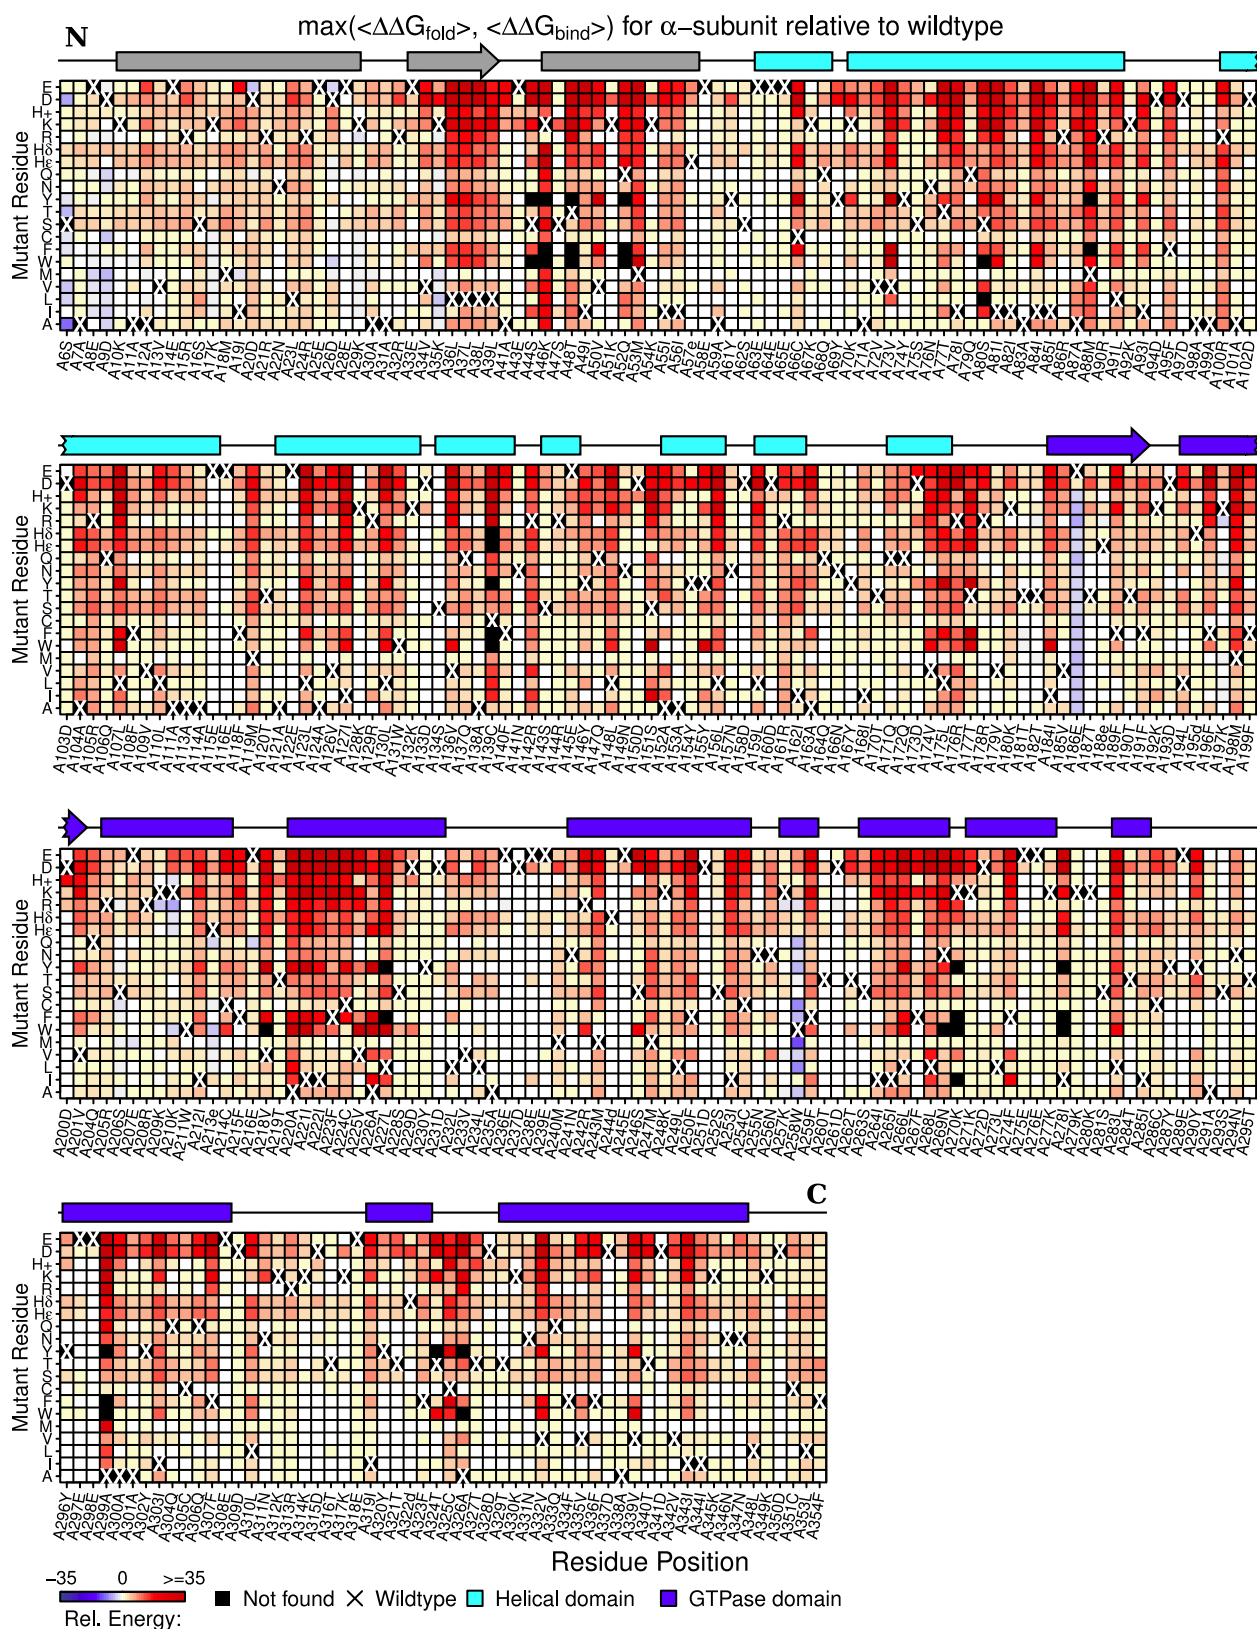

**Figure S10:** Proteins must stably fold and also bind to interaction partners. Here, the maximum energy of either term is shown; most worst-case scenario mutations are either neutral or unfavorable, as seen in yellow and red, respectively.

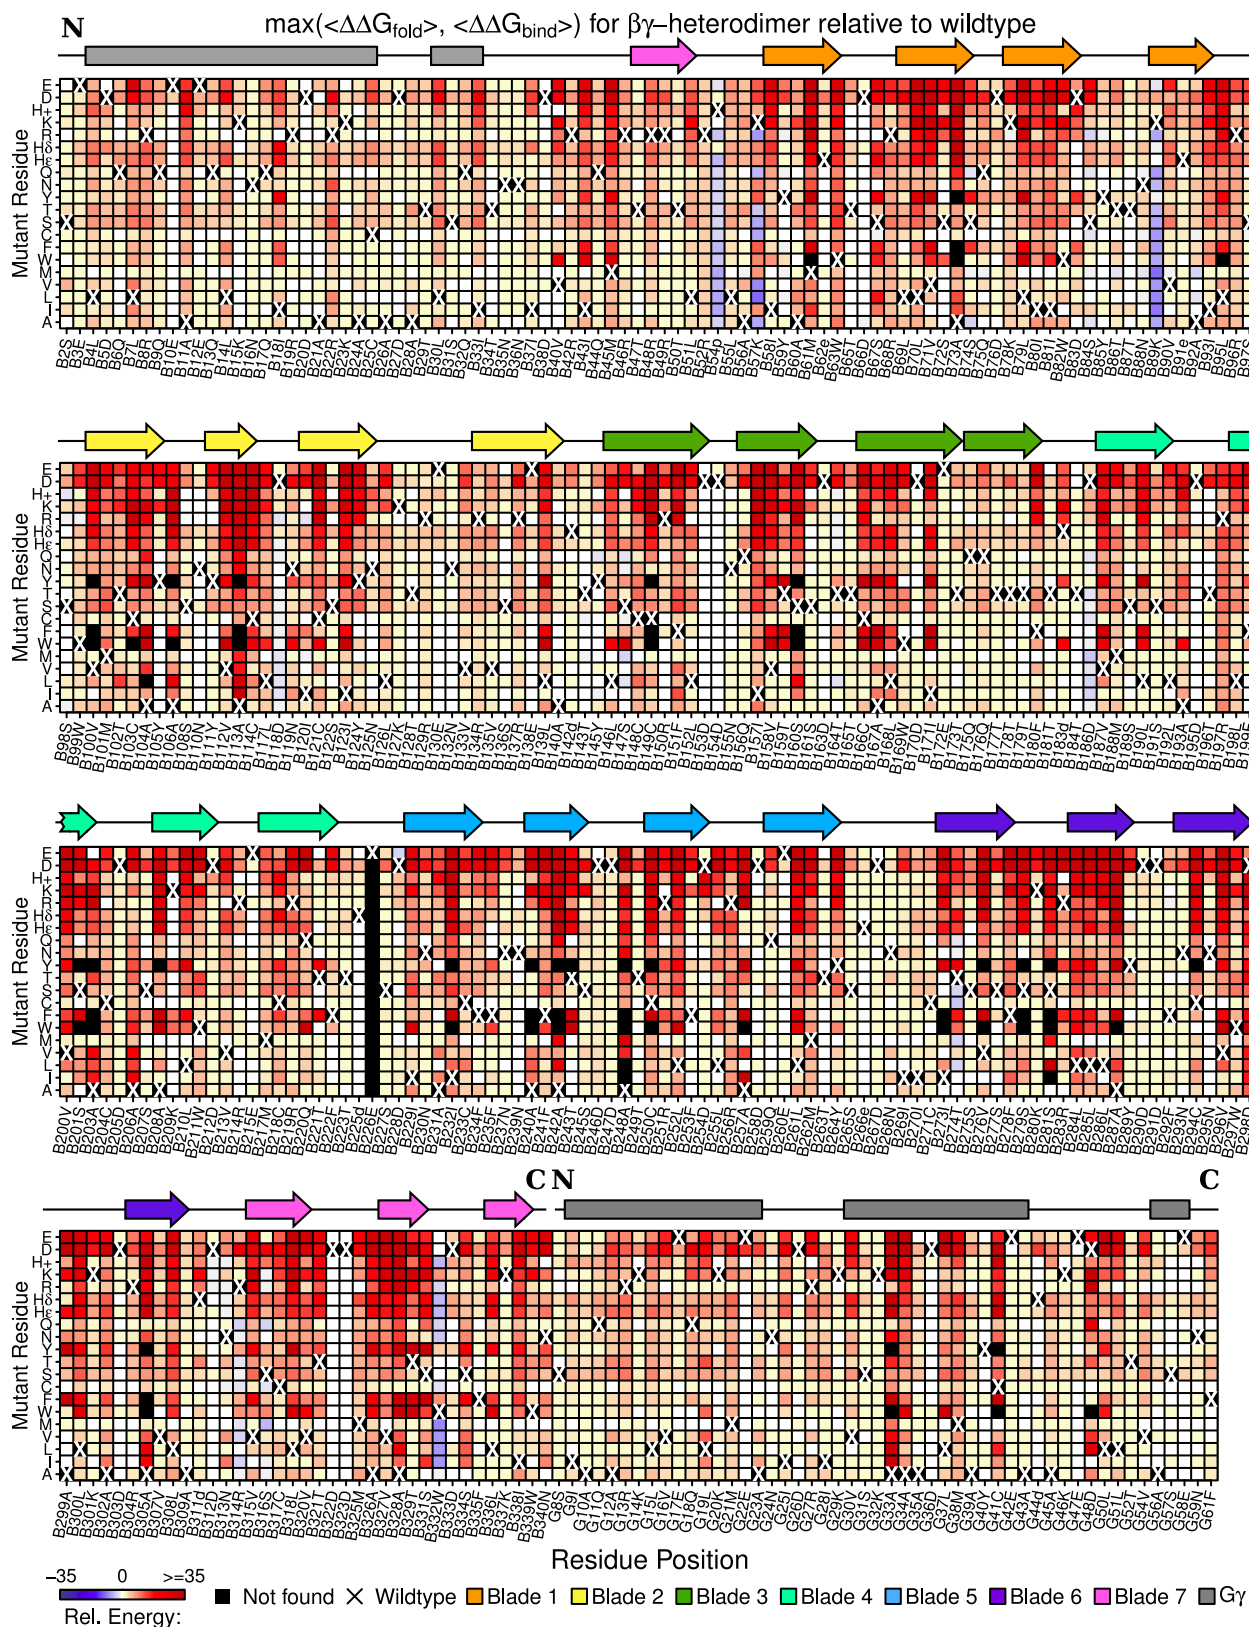

**Figure S11:** Each value shown is the worst of either stability or binding energy terms, since a functional protein must satisfy both requirements. The majority of mutations are either neutral or unfavorable relative to the wild-type sequence, as seen in yellow and red, respectively.

## 48 5 Completeness of computational sampling

49 **Sufficiency of sample size.** Including additional backbone conformations for performing  
 50 DEE/A\* is expected to improve the accuracy of our sampling, and these data can show  
 51 how mutations behave consistently over an ensemble of structures. To determine whether  
 52 or not a sufficient number of representations were used in our analysis, we considered the  
 53 average energy difference between sequential subsets of intervals. Only the energy data for  
 54 stability are considered in this analysis, since variance in binding energy is naturally low due  
 55 to a small number of positions actually involved in binding. From our data, we defined the  
 56 following subsets of conformations (**Table S4**):

**Table S4:** Structures are listed in intervals according to nanosecond in simulation.

---

|           |                                                                                                                               |
|-----------|-------------------------------------------------------------------------------------------------------------------------------|
| <i>A:</i> | [1,5]                                                                                                                         |
| <i>B:</i> | [1,5] $\cup$ [48,52]                                                                                                          |
| <i>C:</i> | [1,5] $\cup$ [48,52] $\cup$ [98,102]                                                                                          |
| <i>D:</i> | [1,5] $\cup$ [48,52] $\cup$ [98,102] $\cup$ [148,152]                                                                         |
| <i>E:</i> | [1,5] $\cup$ [48,52] $\cup$ [98,102] $\cup$ [148,152] $\cup$ [198, 202]                                                       |
| <i>F:</i> | [1,5] $\cup$ [48,52] $\cup$ [98,102] $\cup$ [148,152] $\cup$ [198, 202] $\cup$ [248, 252]                                     |
| <i>G:</i> | [1,5] $\cup$ [48,52] $\cup$ [98,102] $\cup$ [148,152] $\cup$ [198, 202] $\cup$ [248, 252] $\cup$ [298, 302]                   |
| <i>H:</i> | [1,5] $\cup$ [48,52] $\cup$ [98,102] $\cup$ [148,152] $\cup$ [198, 202] $\cup$ [248, 252] $\cup$ [298, 302] $\cup$ [346, 350] |

---

57 The average energy of each sequence was computed for each subset, and we measured  
 58 how this average energy will change from one subset to another, in alphabetical order by  
 59 taking the absolute difference between corresponding sequences:  $|\langle A \rangle - \langle B \rangle|$ ,  $|\langle B \rangle - \langle C \rangle|$ ,  
 60  $|\langle C \rangle - \langle D \rangle|$ , and so forth. The difference in energy variation as the number of structural  
 61 ensembles increased was partitioned into 1-kcal/mol bins, and the distribution of variance  
 62 across them is measured to summarize how sampling improves the consistency of our ener-  
 63 getic data (**Fig. S12**). We found that including additional snapshots could dramatically  
 64 reduce the number of outliers in our protein sequence space. In practice, eliminating out-  
 65 liers entirely might not be possible, if flexible regions exist in the protein being studied; it is  
 66 expected that highly flexible proteins will require more structural conformations for analysis.

67 **Selection of rotamer library.** We were interested in seeing how well the augmented  
 68 Dunbrack–Karplus library ( $\pm 10^\circ$  to each  $\chi_1$ - and  $\chi_2$ -angle) performed by taking DEE/A\*  
 69 results from a single backbone conformation, and applying a Newton–Raphson energy min-  
 70 imization algorithm to it (**Fig. S15**). Due to the large energetic calculations and number  
 71 of residues involved in stability, our analysis only focused on changes in  $\Delta\Delta G_{fold}$ . As indi-  
 72 cated in the main text, approximately 14% of the sequences were found to be unfavorable in  
 73 one approach and favorable in the other. Unfavorable states remained unfavorable in about  
 74 60% of the sequences, while favorable sequences remained favorable in approximately 20%  
 75 of the data. This indicates that only about 7% of over 6000 sequences could be improved  
 76 in a meaningful way using energy minimization. Discrepancies in energy calculations tend  
 77 to arise with the aromatic amino acids, or the charged ones (**Fig. S17**). Most of the ener-  
 78 getic improvements that arise from off-rotamer sampling are very modest: the majority of  
 79 energy differences between the two methods were within 5 kcal/mol of each other, prior to



80 any adjustment with effective temperature (**Fig. S16**). Furthermore, minimization of the  
 81 wild-type structure also contributed to energetic discrepancies between the two methods of  
 82 calculation, by lowering the energy of the reference state.

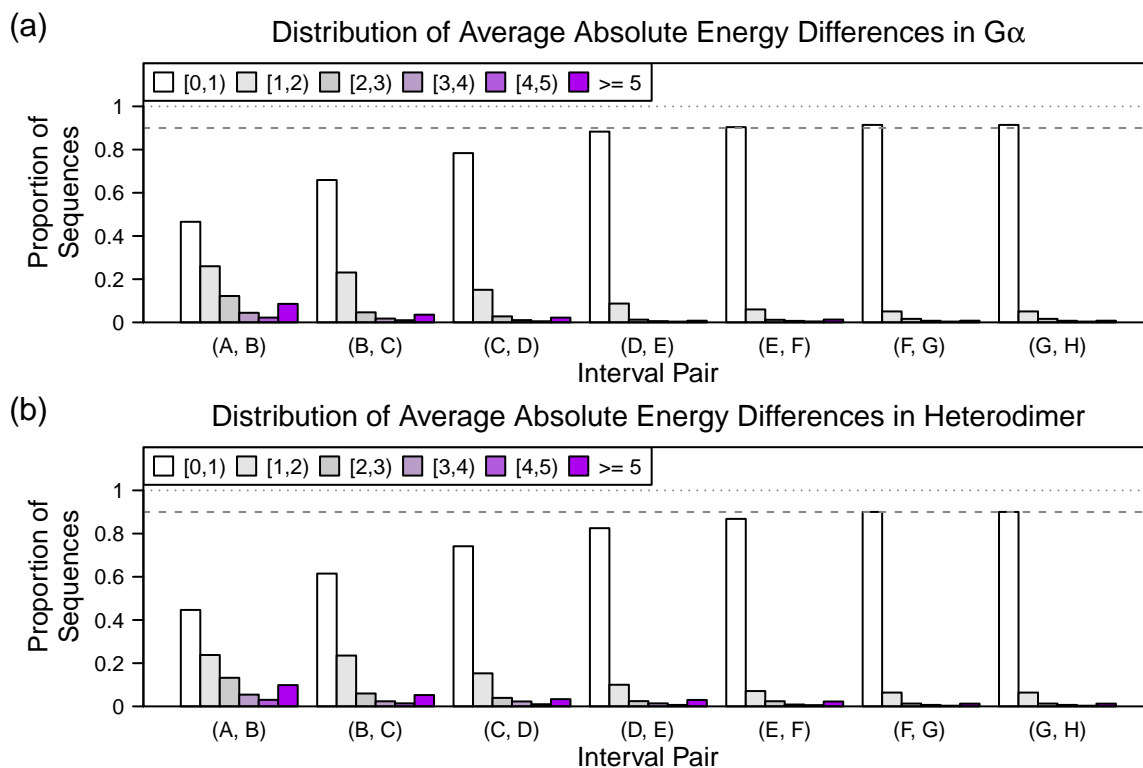

**Figure S12:** The proportion of data at [0,1)-, [1,2)-, [2,3)-, [3,4)-, [4,5)-kcal/mol or  $\geq 5$ -kcal/mol as the number of conformations included in sampling increases (see **Table S4**) is shown. Sequences for  $G\alpha$  and the  $\beta\gamma$ -heterodimer show similar patterns in convergence, as the number of conformations used to represent an ensemble of states increases.

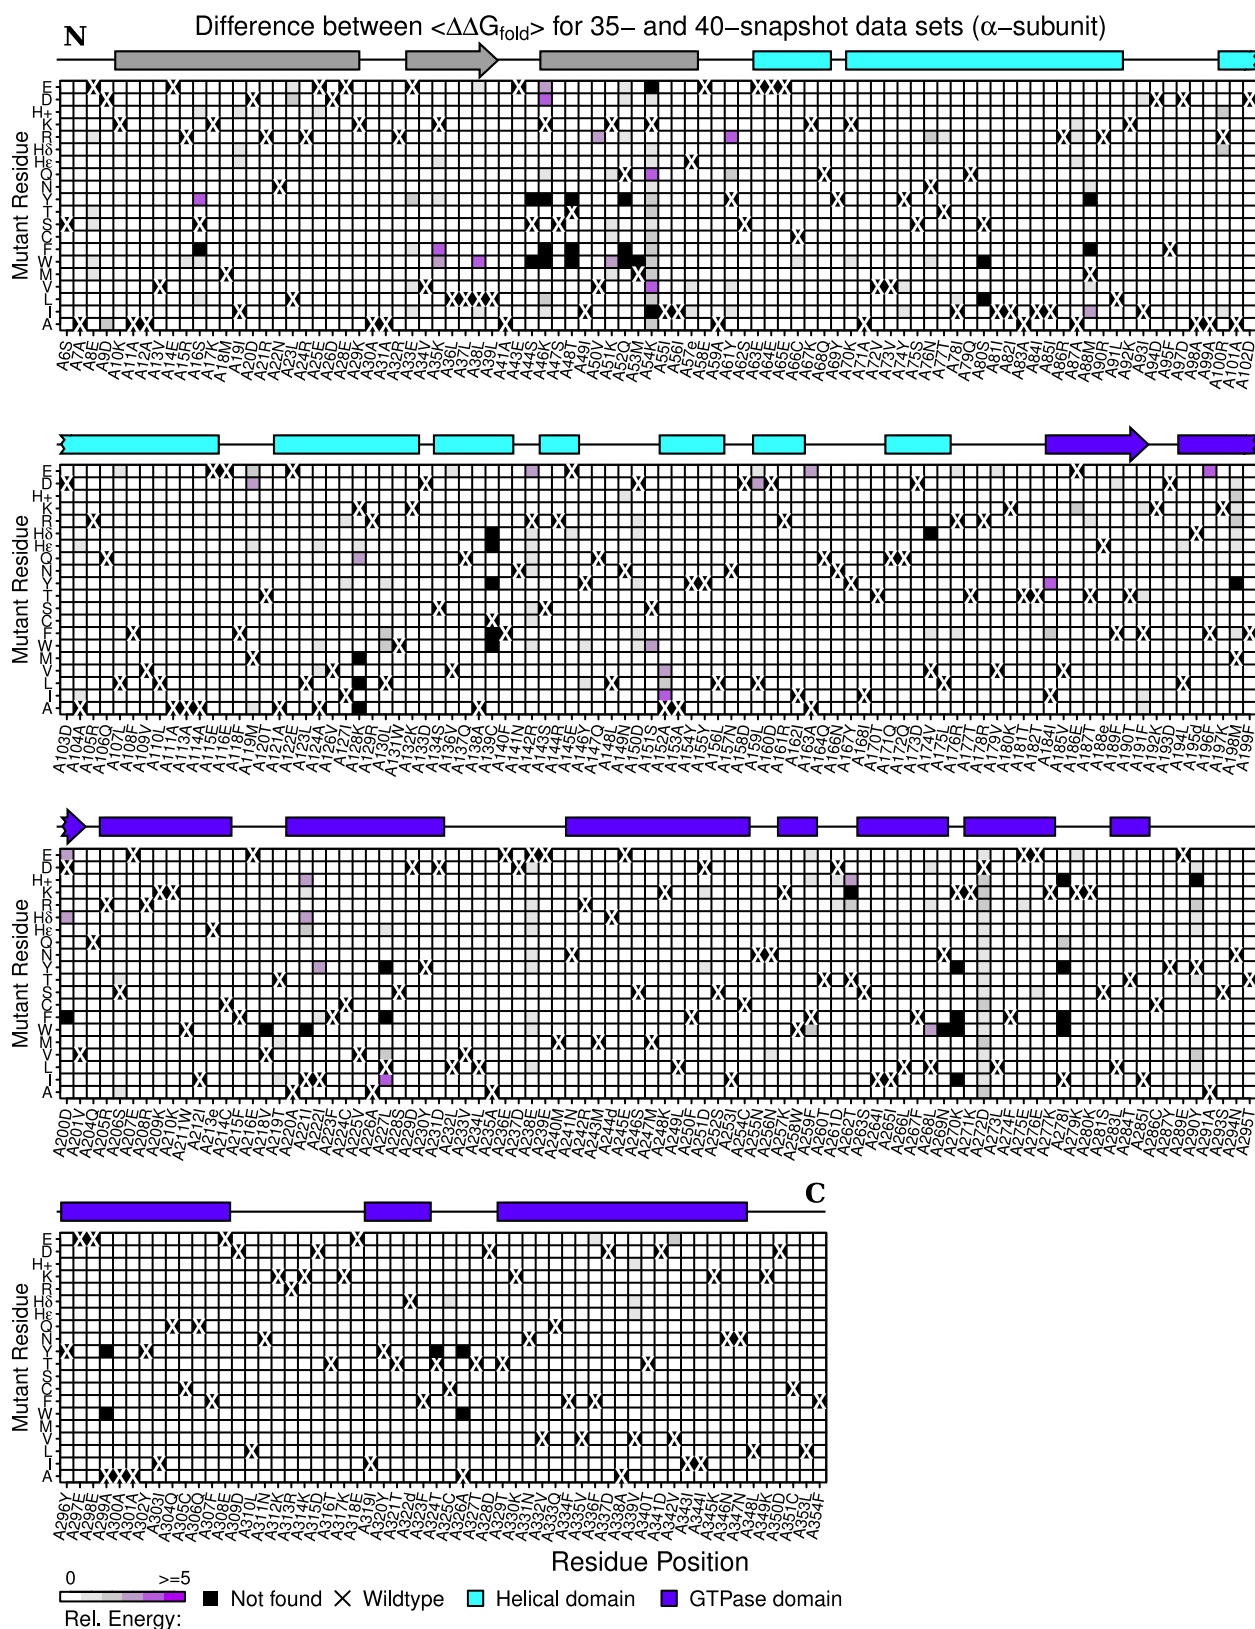

**Figure S13:** Difference between  $\langle \Delta \Delta G_{fold} \rangle$  using a 35- and 40-snapshot data set for  $G\alpha$  is shown here for comparison. Most positions have converged (white and light purple), but there are a few outliers in regions that are harder to sample.

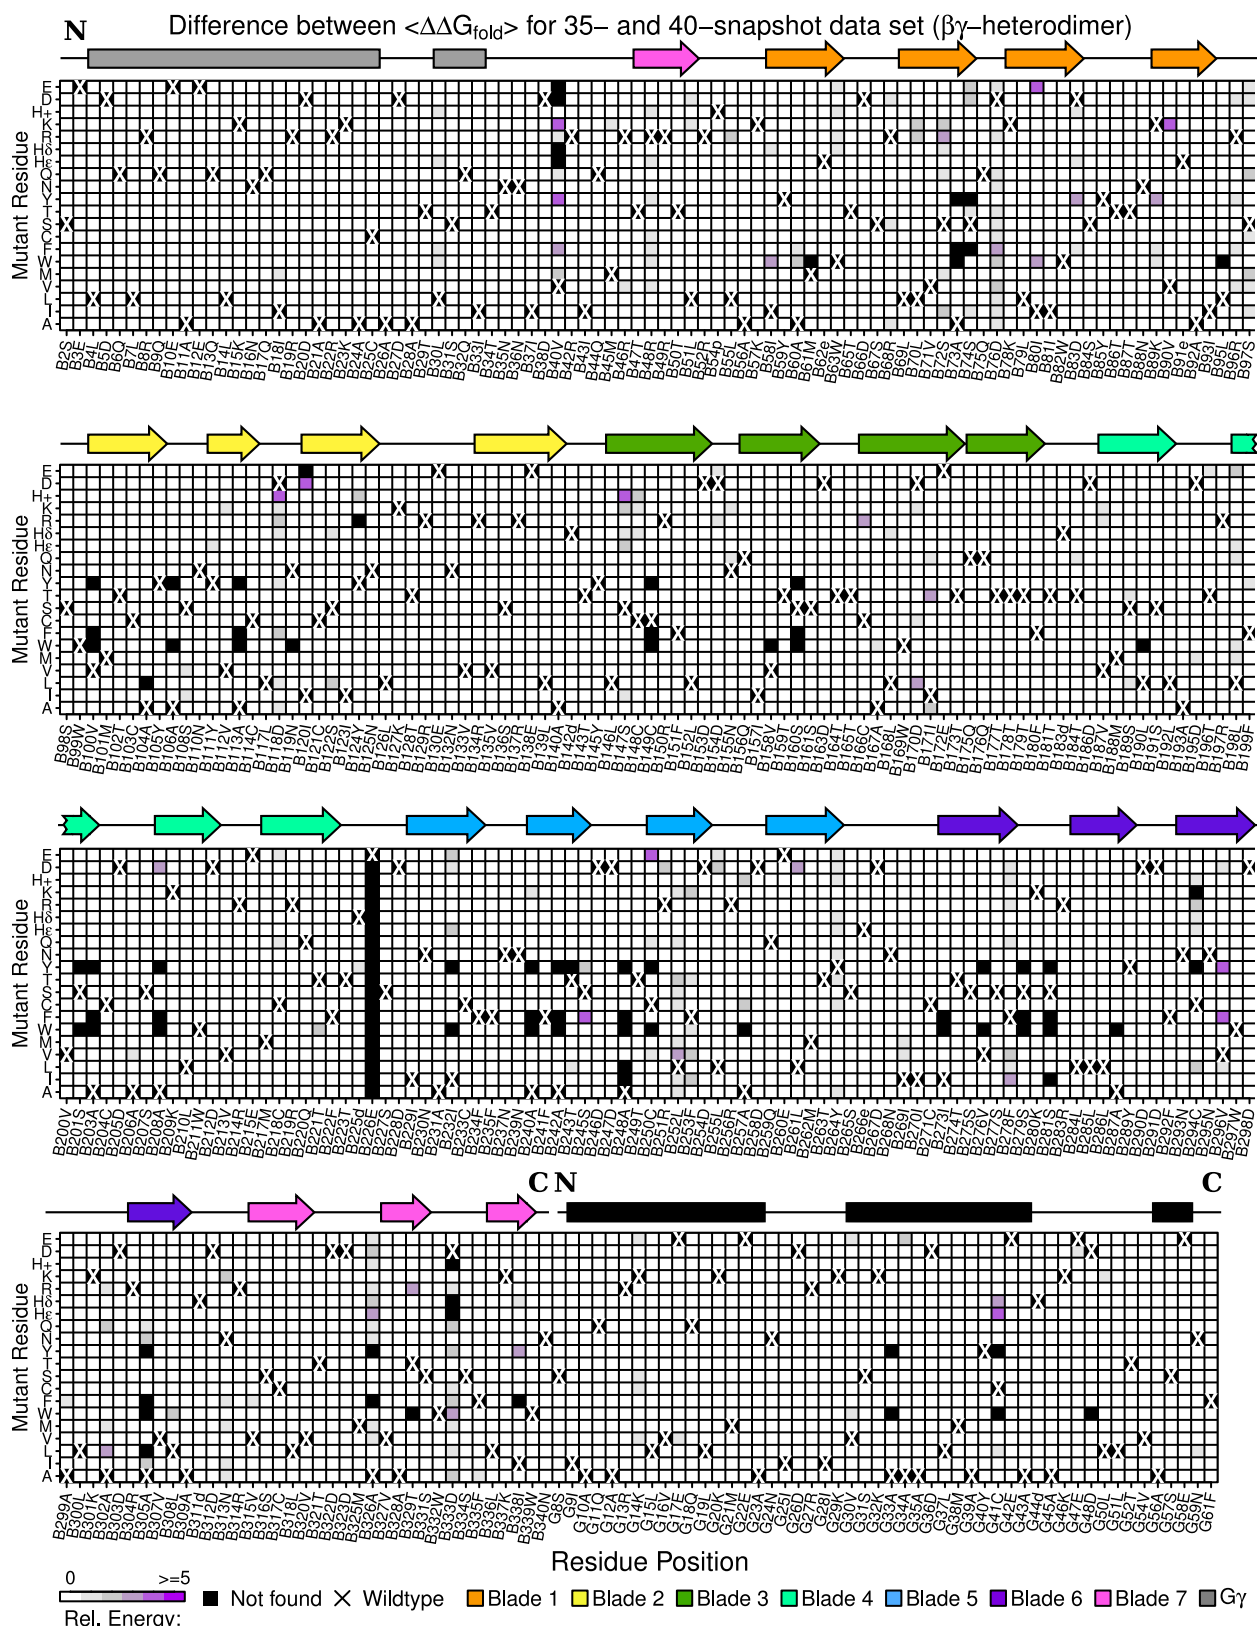

**Figure S14:** Convergence in the data is found in most of the  $\beta\gamma$ -heterodimer, shown here as the difference between  $\langle \Delta \Delta G_{fold} \rangle$  between a 35- and 40-snapshot data set. Purple regions indicate larger energetic variance, while lighter areas suggest minimal energetic variation.

## Performance of Energy Minimization on DEE/A\* Results

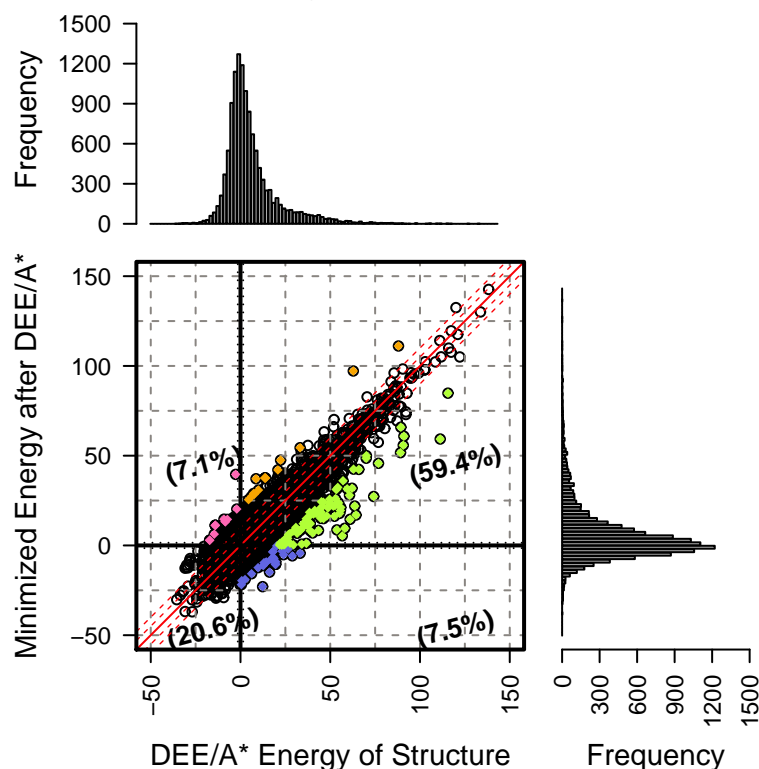

**Figure S15:** A Newton–Rhapson algorithm was used to perform energy minimization on all DEE/A\* structures for one snapshot, to compare the two methods in searching rotamers. The energy landscape is divided into four quadrants to illustrate regions in which energetic improvements can and cannot be achieved when one approach is chosen instead of the other. Red lines indicate where  $y = x$ , and boundaries that are  $-10$ ,  $-5$ ,  $5$  and  $10$  kcal/mol from it are shown in dotted red lines.

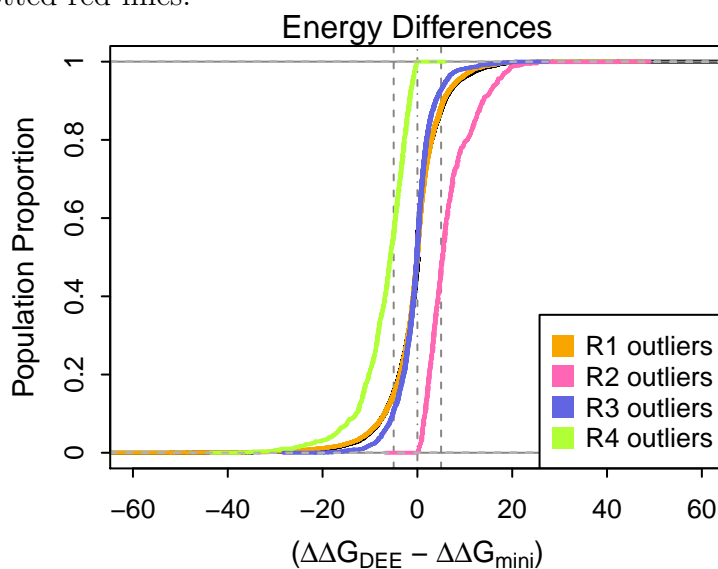

**Figure S16:** Energy difference between the two protocols was computed for each sequence, and a cumulative distribution of all mutant sequences from a single conformation is shown here, based on this computed difference. Colors correspond to the different quadrants defined previously in **Fig. S15**, and gray lines indicate a difference of  $-5$ ,  $0$  or  $5$  kcal/mol for visual reference.

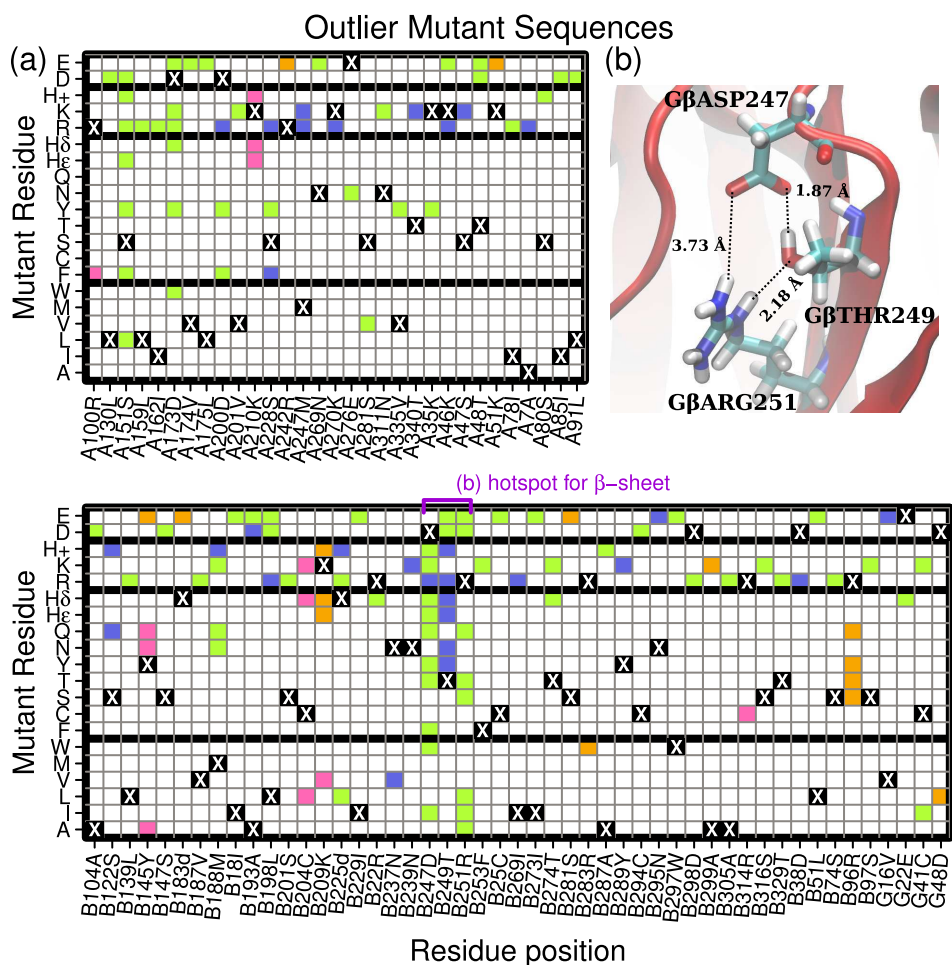

**Figure S17:** Outlier sequences, those having a 20-kcal/mol difference or greater between the two energy calculation methods, for the four quadrants (defined in **Fig. S15**) are shown and reveal underlying substitutions that yield the greatest discrepancy in (a). An example of a  $\beta$ -sheet with specific side-chain packing requirements that consistently favor wild type is shown in (b).

## 83 6 Reflecting evolutionary fitness pressures using 84 DEE/A\* approach

85 **Determining frequency of substitution,  $e_{ij}$ .** Similarity matrices traditionally compute  
86 scores as half-bit units. In general, the observed frequencies of amino acid  $i$  converted into  
87 amino acid  $j$ ,  $e_{ij}$ , is computed, and compared with the expected probabilities of finding  
88 each amino acid naturally ( $p_i$  and  $p_j$ , respectively.) The score,  $S_{ij}$ , reflects how closely  
89 the observed and theoretical (expected) probability are to each other by taking their ratio  
90 (Eq. 1):

$$S_{ij} = 2\log_2 \frac{e_{ij}}{p_i p_j} \quad (\text{Eq. 1})$$

91 For computing  $e_{ij}$ , the number of sequences found to satisfy the 1.5 kcal/mol energetic  
92 cutoff for both structural stability and binding interactions simultaneously was counted, for  
93 each  $(i, j)$ -pair of amino acids, and this number was normalized by the total number of  
94 sequences satisfying this evolutionary pressure. Meanwhile, the distribution of wild-type  
95 amino acids in  $G\alpha_{i1}\beta_1\gamma_2$  was used to compute independent probabilities,  $p_i$  and  $p_j$  (Fig.  
96 **S18**). Unlike the standard similarity matrices, wild type and the mutant amino acid that  
97 it transitions to is clearly defined in DEE/A\*, and thus  $(i, j)$ - and  $(j, i)$ -pairs are unique;  
98 these differences cannot be distinguished in PAM and BLOSUM, and so DEE/A\* yields a  
99 non-symmetric matrix instead.

100 By taking wild type as the probability distribution of each amino acid found in  
101  $G_i\alpha_1\beta_1\gamma_2$  (e.g. the  $p_i$  and  $p_j$  terms) we convert PAM and BLOSUM scores into the ap-  
102 propriate  $e_{ij}$  terms with these as theoretical probabilities. By rearrangement, the expected  
103 frequency of substitution can be expressed as a function of these independent probabilities  
104 and the score given by the similarity matrix, (Eq. 2).

$$\log_2 \frac{e_{ij}}{p_i p_j} = \frac{1}{2} S_{ij}$$

$$e_{ij} = p_i p_j 2^{(S_{ij}/2)} \quad (\text{Eq. 2})$$

105 **Correlation between DEE/A\* with PAM and BLOSUM**) A strong correlation exists  
106 between the expected values from DEE/A\* and those derived starting from PAM or BLO-  
107 SUM scores. To start, we looked at protein fitness as the sum of structural stability and  
108 binding interactions, at different proportions, and found that a uniform contribution from  
109 both aspects of fitness optimizes the correlation between the two different approaches of  
110 computing  $e_{ij}$ , regardless of the similarity matrix being used for comparison, **Fig. S19** and  
111 **Fig. S20**. The exact contribution of each term to overall fitness, of course, cannot be deter-  
112 mined; regardless of the defined proportions, the comparison between DEE/A\* with these  
113 similarities matrices outperforms randomly generated data, either from drawing random val-  
114 ues within the boundaries of PAM and BLOSUM scores or by shuffling the entries of each  
115 respective similarity matrix. Computations are very quick for these random samples, and we  
116 have found from 250, 500 and 1000 trials that the Pearson's correlation coefficient remains  
117 unchanged (**Fig. S22**, and **Table S5**). The influence of permuting PAM120 or BLOSUM62

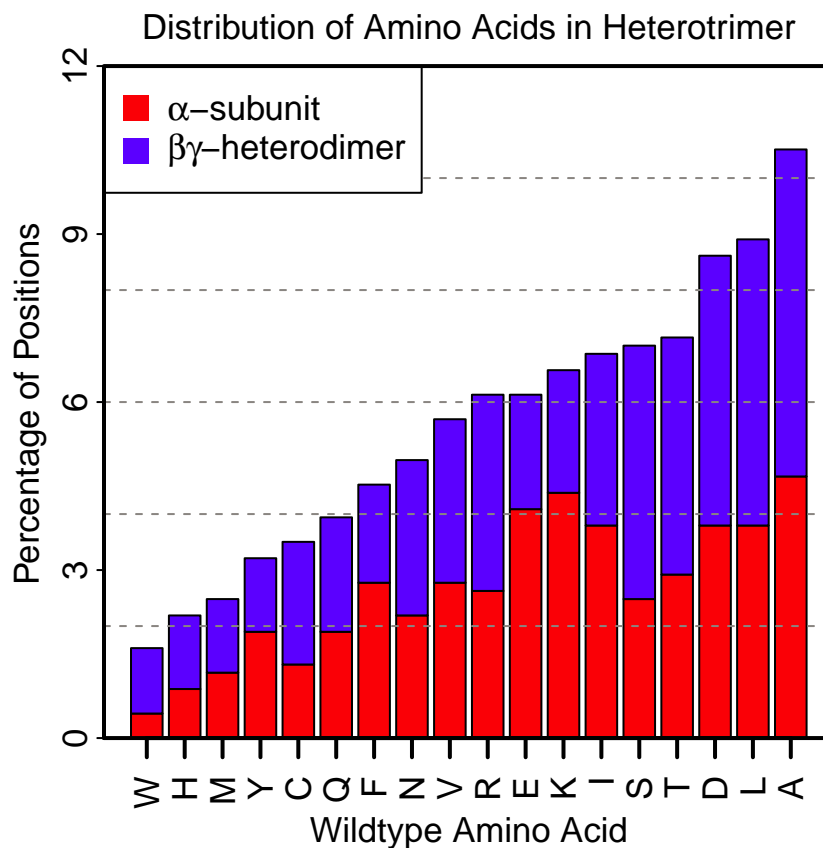

**Figure S18:** Distribution of wild type amino acids in  $G_{\alpha_i1\beta_1\gamma_2}$  are normalized and used to provide theoretical probabilities for assessing DEE/A\* performance.

118 is shown by comparing the correlation between the chosen original matrix and the permuted  
 119 version; a total of 250, 500 and 1000 trials were performed, and the correlation between these  
 120 two sets of matrices is consistent ( $\rho^2 \approx 0.7$  or  $0.8$  for PAM120 and BLOSUM62, respectively.)  
 121 Furthermore, while some correlation between DEE/A\* and the permuted matrices exist, this  
 122 relationship is strongest when the  $(i, j)$  pairs are clearly identified, suggesting that DEE/A\*  
 123 can discriminate between amino acids well (**Fig. S21**).

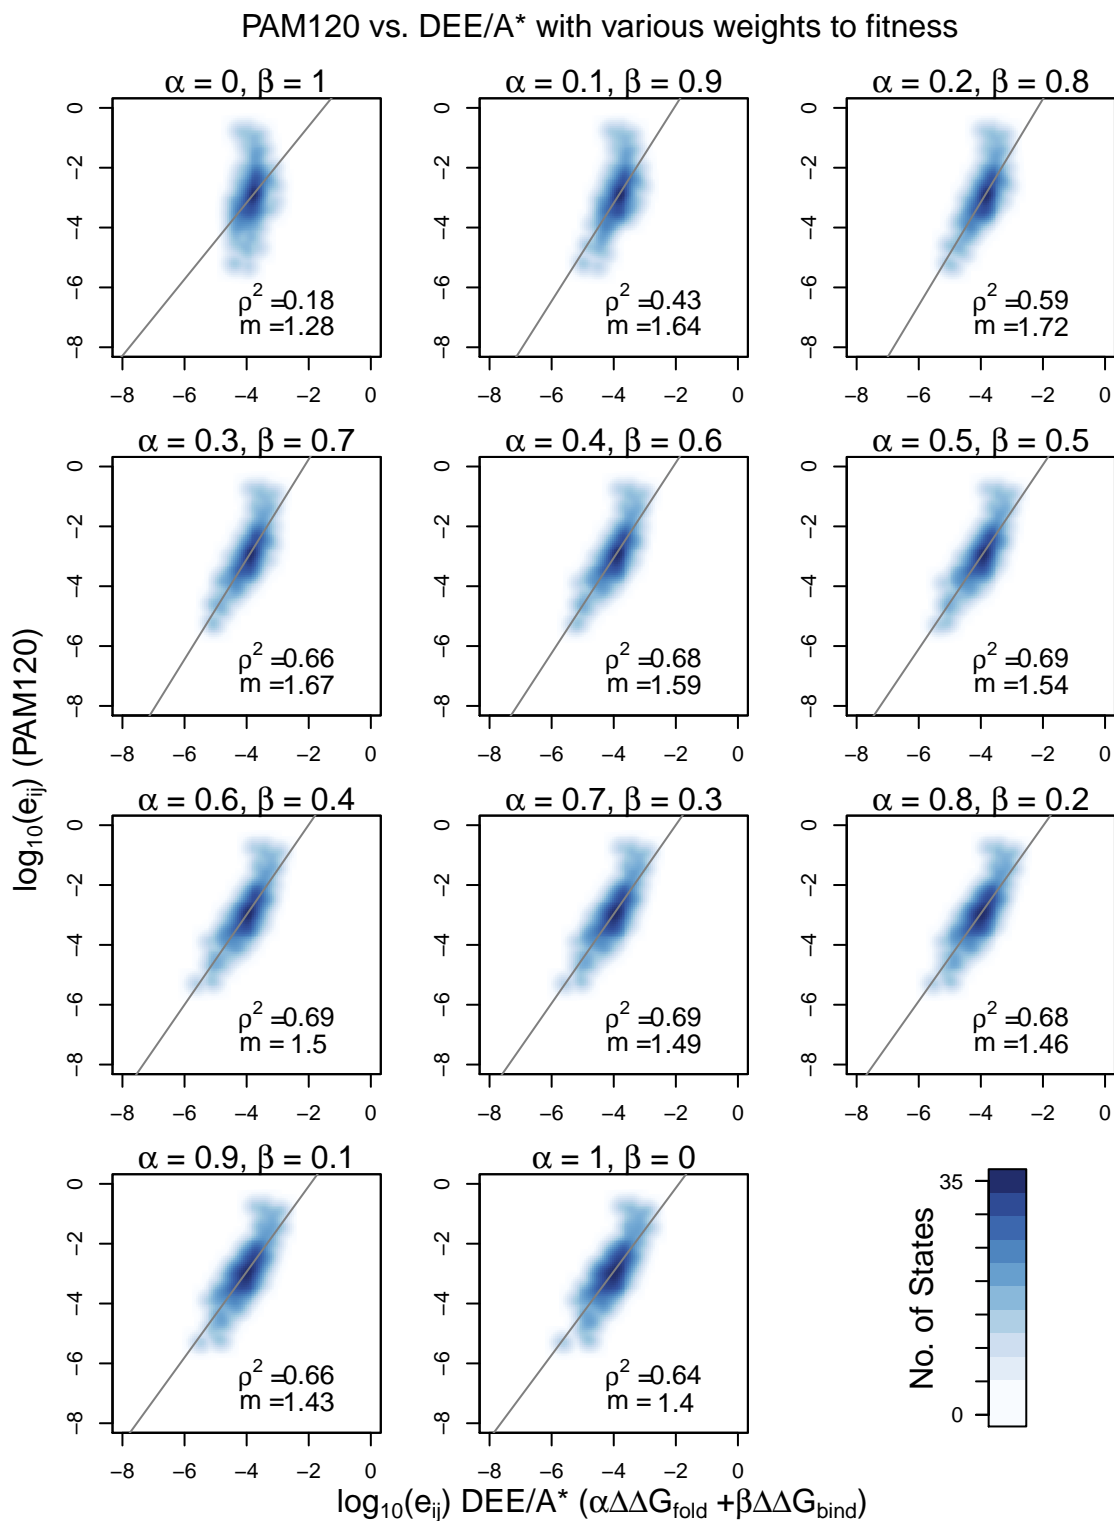

**Figure S19:** Different proportions of stability and binding were used to define the energetic criteria for survival. Correlation between the expected rate of substitution of amino acid  $i$  with  $j$ ,  $e_{ij}$ , is compared between PAM120 and DEE/A\* data. Pearson's correlation coefficient and the slope of the least-squares fit are included. The best-fit line is shown in black.



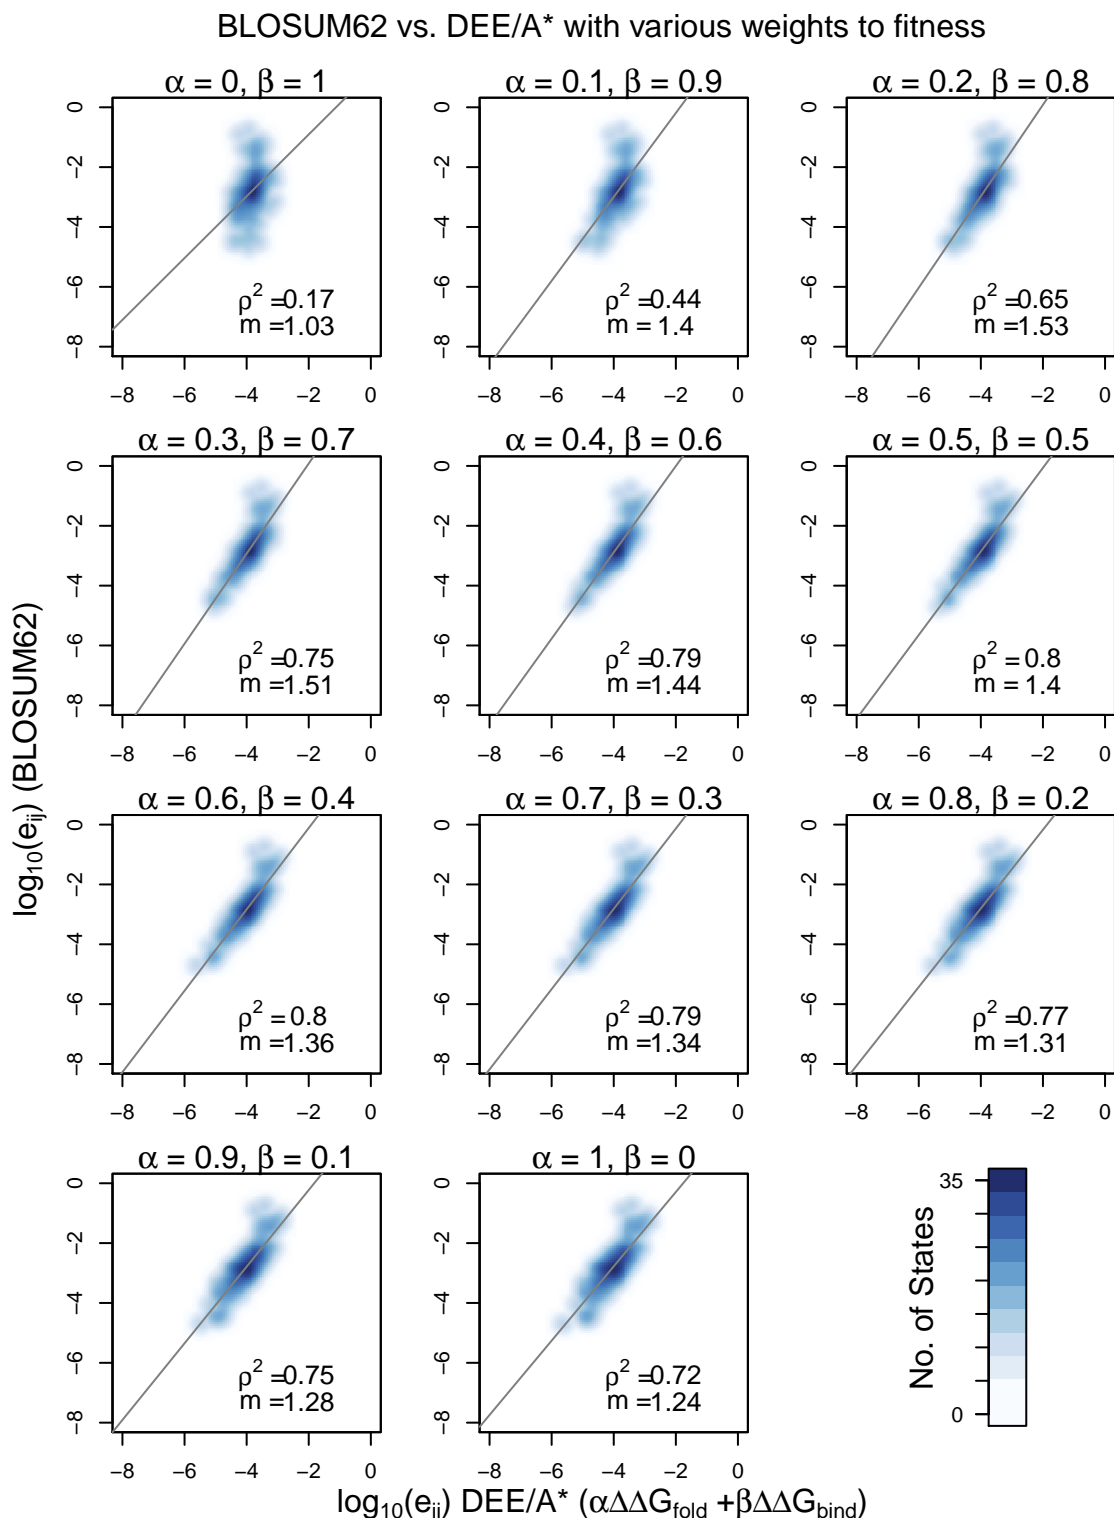

**Figure S20:** Starting with BLOSUM62 scores, the expected frequency of finding amino acid  $i$  replacing  $j$ ,  $e_{ij}$ , was calculated with DEE/A\* data, for different combinations of energy contribution from stability and binding interactions. Analogous values were computed from BLOSUM62, so that the two sets of substitution rates can be compared. Pearson's correlation coefficient as well as the slope of the least-squares fit is shown for each; the best-fit line is also drawn.

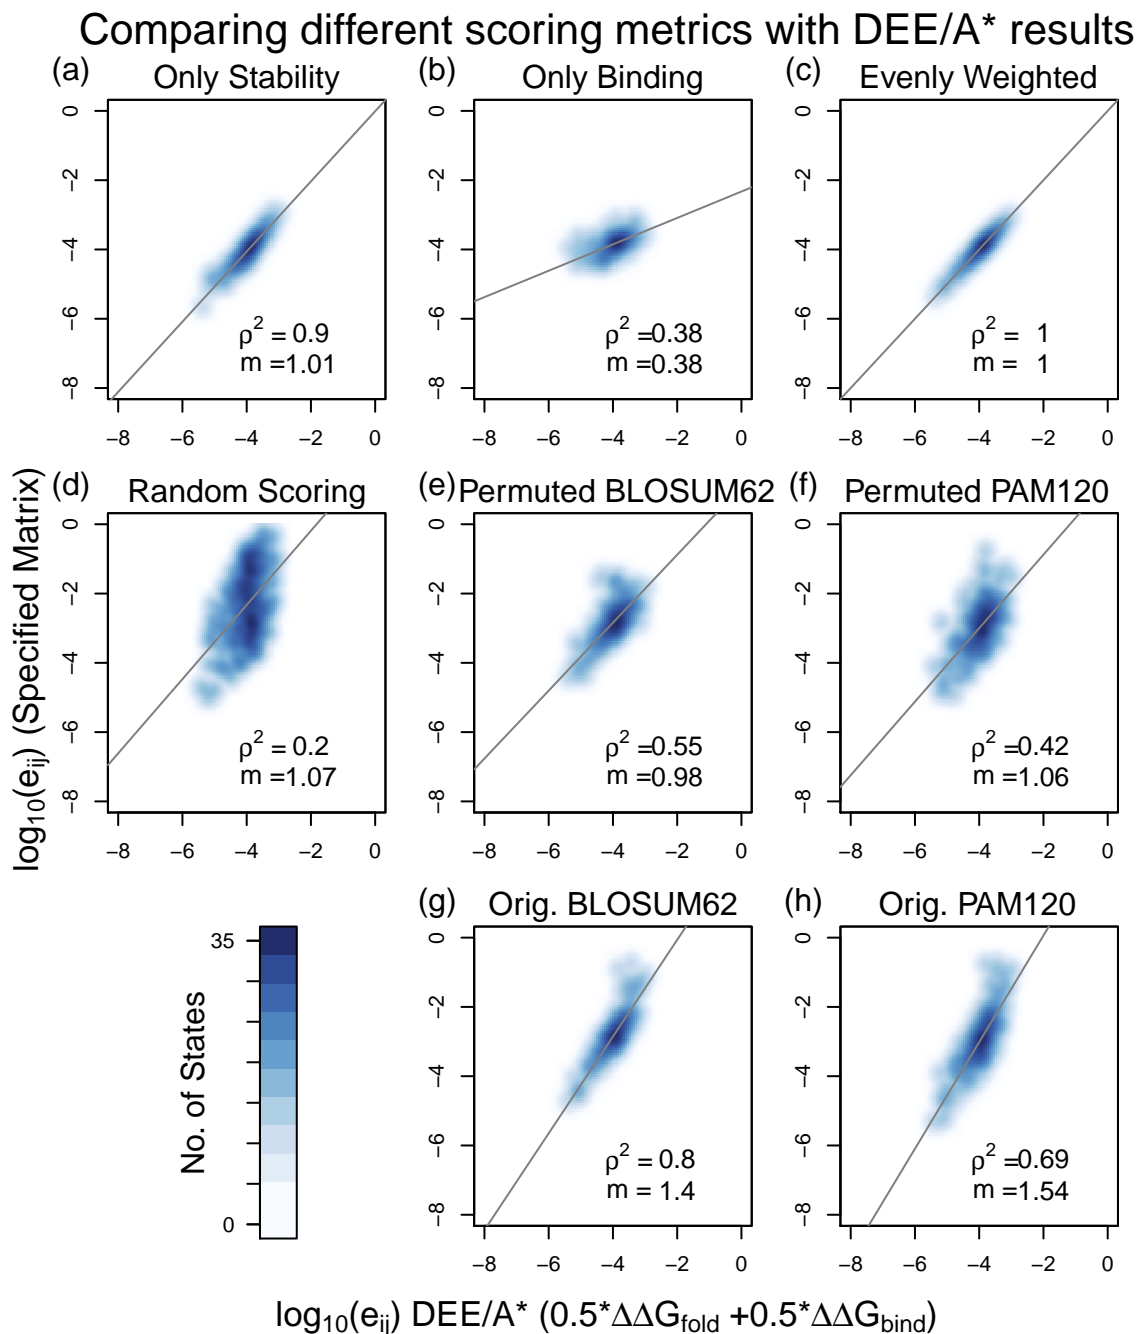

**Figure S21:** Assuming a uniform contribution from stability and binding, expected frequencies of substitution,  $e_{ij}$ , were compared to (from left to right) scores: (a) accounting only for stability; (b) accounting only for binding; (c) in which stability and binding are evenly weighted (50–50); (d) generated from a uniform distribution, bounded by  $\max(\text{BLOSUM62}, \text{PAM120})$  (e) permuted BLOSUM62 matrix; (f) permuted PAM120 matrix; (g) original BLOSUM62 matrix; and (h) original PAM120 matrix.

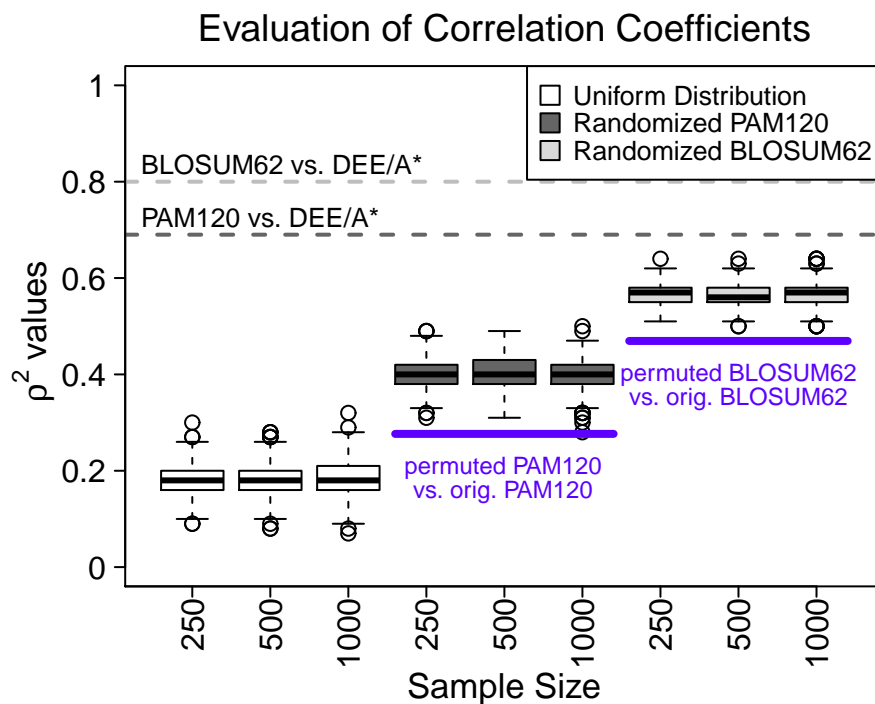

**Figure S22:** The Pearson’s correlation coefficient between DEE/A\* data (with 50–50 distribution between stability and binding interactions) and permuted matrix from either a random distribution (white), PAM120 (gray) or BLOSUM62 (light gray) was computed for samples of size  $n = 250, 500$  and  $1000$ . Distributions are generally consistent within each family of distributions. Dotted lines indicate the correlation measured between the original PAM120 (gray) or BLOSUM62 (light gray) with DEE/A\* based on a 50–50 contribution from each aspect of fitness, as seen in **Fig. S19** and **Fig. S20**. Solid, indigo lines indicate the correlation between either PAM120 or BLOSUM62 with the permuted version of itself.

**Table S5:** Average Pearson’s correlation coefficient between DEE/A\* and randomly generated data for various sample sizes. Number of samples given by  $n$ .

| Randomized matrix    | $n = 250$       | $n = 500$       | $n = 1000$      |
|----------------------|-----------------|-----------------|-----------------|
| Uniform distribution | $0.18 \pm 0.03$ | $0.18 \pm 0.04$ | $0.18 \pm 0.04$ |
| PAM120 values        | $0.40 \pm 0.03$ | $0.40 \pm 0.03$ | $0.40 \pm 0.03$ |
| BLOSUM62 values      | $0.57 \pm 0.02$ | $0.56 \pm 0.02$ | $0.57 \pm 0.02$ |

**Table S6:** Average Pearson’s correlation coefficient between original similarity matrix and the permuted version. Number of samples given by  $n$ .

| Similarity matrix | $n = 250$       | $n = 500$       | $n = 1000$      |
|-------------------|-----------------|-----------------|-----------------|
| PAM120            | $0.27 \pm 0.03$ | $0.28 \pm 0.03$ | $0.28 \pm 0.03$ |
| BLOSUM62          | $0.46 \pm 0.03$ | $0.47 \pm 0.03$ | $0.47 \pm 0.03$ |

## 124 7 Comparisons with established experimental data

125 **Alanine scan of  $G\alpha$ .** A full-scale alanine scan was performed by Sun, *et al.* for  $G\alpha$  in  
 126 which thermal stability was measured relative to wild type ( $\Delta T_m$ ) for all single mutants. The  
 127 corresponding alanine mutations from our DEE/A\* were used for comparison to these data.  
 128 In our analysis, a positive outcome was defined as a mutation that was destabilizing relative  
 129 to wild type ( $\Delta\Delta G_{fold} > +1.5$  kcal/mol), which would suggest that native interactions were  
 130 important for structural stability. We quantified the proportion of

- 131 • true positives ( $\Delta\Delta G_{fold} > 1.5$  kcal/mol &  $\Delta T_m \leq -2^\circ C$ )
- 132 • true negatives ( $\Delta\Delta G_{fold} \leq 1.5$  kcal/mol &  $\Delta T_m > -2^\circ C$ )
- 133 • false positives ( $\Delta\Delta G_{fold} > 1.5$  kcal/mol &  $\Delta T_m \leq -2^\circ C$ ) and
- 134 • false negatives ( $\Delta\Delta G_{fold} \leq 1.5$  kcal/mol &  $\Delta T_m > -2^\circ C$ )

135 The relationship between thermal stability and our DEE/A\* calculations is illustrated  
 136 in **Figure S23**, and we report additional statistics in **Table S7**. To provide a basis for  
 137 comparing these proportions, the mutation free energy for DEE/A\* and thermal stability  
 138 were randomized for a total of 5000 independent trials, then compared again to measure  
 139 the proportion of different outcomes (**Table S7** & **Fig. S24**). We found that the observed  
 140 number of correctly identified outcomes (true positives and true negatives) were consistently  
 141 higher than expected, and that the proportion of incorrect predictions (false positives and  
 142 false negatives) were consequently much lower. These results were further quantified in terms  
 143 of sensitivity and specificity (**Table S8**), and we found that sensitivity was much higher than  
 144 the randomized energy data. Here, there is a natural trade-off with specificity, which was  
 145 found to be relatively lower in comparison to the shuffled energy values.

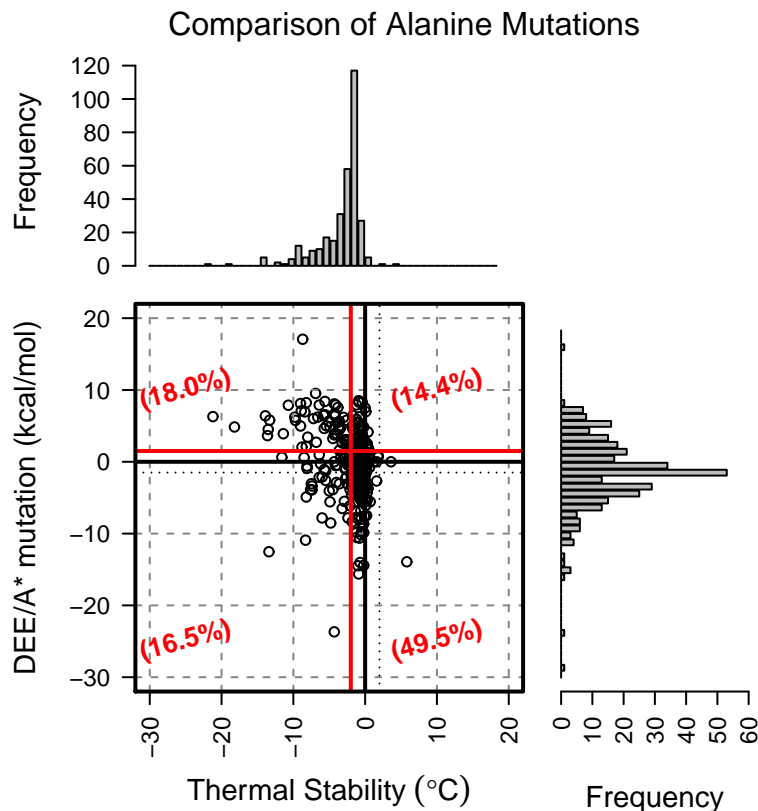

**Figure S23:** The energetic difference between each wild-type residue and corresponding alanine mutation in the stability of  $G\alpha$ -GDP are shown here. The thermal stability ( $\Delta T_m$ ) between alanine mutations and wild type measured by Sun, *et al.* were used for comparison with the alanine mutants from our DEE/A\* computations for structural stability. The red vertical lines correspond to  $-2^\circ\text{C}$ , the threshold used by Sun, *et al.* to indicate that native interactions were important in stabilizing  $G\alpha$ -GDP, while the red horizontal line is the cutoff used in our calculations to indicate that a substitution is unfavorable relative to the wild-type residue. These red lines are used to define the four different quadrants, and the percentage in each region is shown in red text within parentheses. (See also **Fig. S7**.)

**Table S7:** Correlation between alanine mutants for DEE/A\* calculations and thermal stability data measured by Sun, *et al.* was quantified by the proportions of true positives, false positives, true negatives and false negatives. The sensitivity and specificity of our computational approach were also calculated. (See also **Fig. S23**.)

|                   |                                    | DEE/A* calculations                     |                                           |
|-------------------|------------------------------------|-----------------------------------------|-------------------------------------------|
|                   |                                    | $\Delta\Delta G_{fold} > +1.5$ kcal/mol | $\Delta\Delta G_{fold} \leq 1.5$ kcal/mol |
| Thermal Stability | $\Delta T_m \leq -2^\circ\text{C}$ | 18.0% ( $n = 59$ )                      | 14.4% ( $n = 47$ )                        |
|                   | $\Delta T_m > -2^\circ\text{C}$    | 16.5% ( $n = 54$ )                      | 49.5% ( $n = 162$ )                       |
|                   |                                    | Sensitivity:<br>0.52                    | Specificity:<br>0.78                      |

**Table S8:** After randomizing the DEE/A\* alanine mutants, the proportion of true positives, false positives, false negatives and true negatives were measured. The reported values are the average and standard deviations for each category after 5000 independent calculations. The sensitivity and specificity have also been measured. (See also **Fig. S24.**)

|                   |                              | DEE/A* calculations (randomized)        |                                           |
|-------------------|------------------------------|-----------------------------------------|-------------------------------------------|
|                   |                              | $\Delta\Delta G_{fold} > +1.5$ kcal/mol | $\Delta\Delta G_{fold} \leq 1.5$ kcal/mol |
| Thermal Stability | $\Delta T_m \leq -2^\circ C$ | $11.0 \pm 1.2\%$                        | $21.4 \pm 1.2\%$                          |
|                   | $\Delta T_m > -2^\circ C$    | $23.1 \pm 1.2\%$                        | $42.8 \pm 1.2\%$                          |
|                   |                              | Sensitivity:<br>$0.32 \pm 0.04$         | Specificity:<br>$0.67 \pm 0.02$           |

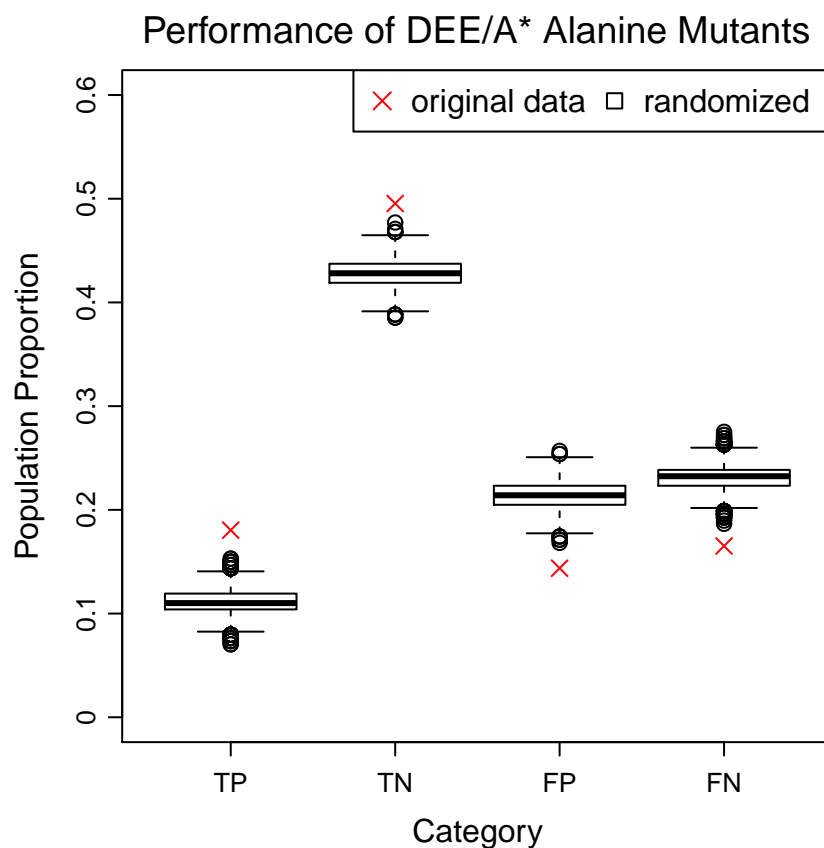

**Figure S24:** The proportions of different true positive, true negative, false positive and false negative outcomes were calculated, and the distribution of these values from randomized data are shown using box-and-whiskers for each outcome type. Red X's are included to represent the computed values of each category from the initial comparison of DEE/A\* and thermal stability.

146 **Oncogenic point mutations in  $G\beta$ .** The original list of point mutations was provided  
147 by Yoda, *et al.* in the supplementary information of their publication. This included a  
148 few mutations that were not suitable for comparison, such as mutations to glycine or using  
149 splice variants, which are not covered by our computational protocol, and thus excluded  
150 from analysis. Mutations to histidine were taken as the average mutation free energy of all  
151 three possible histidine states ( $\delta$ -,  $\epsilon$ - and doubly-protonated) as modeled by CHARMM. A  
152 total of 36 point mutations were available for analysis, and are listed in **Table S9**. From our  
153 DEE/A\* calculations for each point mutation listed, the stability and binding interactions  
154 relative to wild type were used to categorize mutations as gain-of-function, neutral or loss-  
155 of-function. These energetic cutoffs were based on previous definitions using  $\pm 1.5$  kcal/mol.  
156 Mutations were assessed as independent aspects of fitness, and also simultaneously. For  
157 the latter, we measured the maximum magnitude of either structural stability or binding  
158 interactions. (See main text.)

**Table S9:** The original list of GNB1 mutations was compiled and amended by Yoda, *et al.* A condensed version of point mutations that could be compared to our DEE/A\* data (*e.g.* not a glycine mutation, splice variant or non-specific mutation) is provided here, along with the computed DEE/A\* values for G $\beta$  structural stability ( $\Delta\Delta G_{fold}$ ) and binding interactions ( $\Delta\Delta G_{bind}$ ). References may be from Yoda, *et al.*, COSMIC, cBioPortal or a specific publication, in which the PubMed identification number is provided.

| Mutation | $\Delta\Delta G_{fold}$ | $\Delta\Delta G_{bind}$ | References          | Mutation | $\Delta\Delta G_{fold}$ | $\Delta\Delta G_{bind}$ | References          |
|----------|-------------------------|-------------------------|---------------------|----------|-------------------------|-------------------------|---------------------|
| A11V     | -4.0                    | 0.0                     | COSMIC              | D118Y    | -7.3                    | -7.9                    | COSMIC              |
| R19L     | -11.5                   | 0.0                     | COSMIC              | S147A    | -14.7                   | -3.2                    | Yoda, <i>et al.</i> |
| A21S     | 2.1                     | 0.0                     | COSMIC              | B177K    | -10                     | 0.0                     | 24220272            |
| Q32K     | 0.6                     | 0.0                     | COSMIC              | S191C    | -13                     | 0.0                     | COSMIC              |
| T47M     | -11.6                   | 0.0                     | COSMIC              | D205N    | -14.7                   | 0.5                     | COSMIC              |
| p54N     | -16.8                   | -17.0                   | COSMIC              | E215D    | -5.9                    | 0.0                     | cBioPortal          |
| K57E     | -1.2                    | 4.3                     | Yoda, <i>et al.</i> | d225L    | -24.3                   | -0.1                    | 23292937            |
|          |                         |                         | COSMIC              | D228N    | -17.9                   | -7.1                    | cBioPortal          |
| L57E     | -1.2                    | 4.3                     | Yoda, <i>et al.</i> | N230S    | -4.4                    | -11.0                   | COSMIC              |
|          |                         |                         | COSMIC              | R256H    | 5.1                     | 5.1                     | cBioPortal          |
|          |                         |                         | 24220272            | D258N    | -25.4                   | 0.0                     | COSMIC              |
|          |                         |                         | 23443460            | E260K    | -9.8                    | 0.0                     | COSMIC              |
| K57N     | -8.4                    | -2.2                    | 23443460            | M262T    | 2.8                     | 0.0                     | COSMIC              |
| K57T     | -2.7                    | -1.9                    | COSMIC              | I269T    | -22.4                   | 0.0                     | COSMIC              |
| K78E     | -4.0                    | 0.3                     | COSMIC              | K280N    | -5.8                    | 0.0                     | cBioPortal          |
|          |                         |                         | cBioPortal          | S281N    | -1.1                    | 0.0                     | COSMIC              |
| K78Q     | -10.0                   | -3.7                    | Yoda, <i>et al.</i> | R283C    | -15.5                   | 0.0                     | COSMIC              |
| I80N     | -3.8                    | -1.8                    | Yoda, <i>et al.</i> | R314H    | -5.3                    | -5.3                    | 23699601            |
|          |                         |                         | 22343534            | A326T    | 4.8                     | 0.0                     | cBioPortal          |
| I80T     | 2.5                     | -11.1                   | Yoda, <i>et al.</i> |          |                         |                         |                     |
|          |                         |                         | COSMIC              |          |                         |                         |                     |
|          |                         |                         | 23699601            |          |                         |                         |                     |
|          |                         |                         | 24220272            |          |                         |                         |                     |
| N88D     | 2.4                     | -18.1                   | Yoda, <i>et al.</i> |          |                         |                         |                     |
| K89E     | -17.9                   | -17.1                   | Yoda, <i>et al.</i> |          |                         |                         |                     |
| K89T     | -20.5                   | -20.6                   | 24220272            |          |                         |                         |                     |
| R96H     | 0.4                     | -0.4                    | COSMIC              |          |                         |                         |                     |



## 159 8 Statistical analysis for predictions

160 The Boltzmann-weighted mean of each mutant sequence was computed to determine the  
 161 average change in all 40 structural states used. For each position, this provided twenty  
 162 unique values (one for each amino acid) which summarized all mutational effects. From this  
 163 vector of numbers, values on the  $[-1.5, 1.5]$ -kcal/mol interval were assigned zero to represent  
 164 no change. A 20-dimensional zero vector was thus chosen for the null hypothesis, and the  
 165 Mann–Whitney–Wilcoxon test was performed using R for every position in the heterotrimer.  
 166 Computed  $p$ -values are shown in **Fig. S25** and grouped according to (1) whether or not  
 167 position is known to have binding interactions (according to Wall, *et al.*) and (2) whether  
 168 mutation free energy is based on  $\Delta\Delta G_{fold}$  or  $\Delta\Delta G_{bind}$ .

169 The findings for data based on binding interactions are discussed in the main text. A  
 170 detailed list for true positives, false negatives and predicted positions can be found in **Tables**  
 171 **S10 & S11**. The calculations for stabilizing interactions, however, suggest that nearly all  
 172 positions have a meaningful contribution to protein tertiary structure (low  $p$ -values). Given  
 173 that this protein family is highly evolved and that the mutational profiles (**Fig. S5–S11**)  
 174 suggested that most substitutions are unfavorable, alternative metrics would need to be  
 175 applied to further separate side chains into varying degrees of involvement.

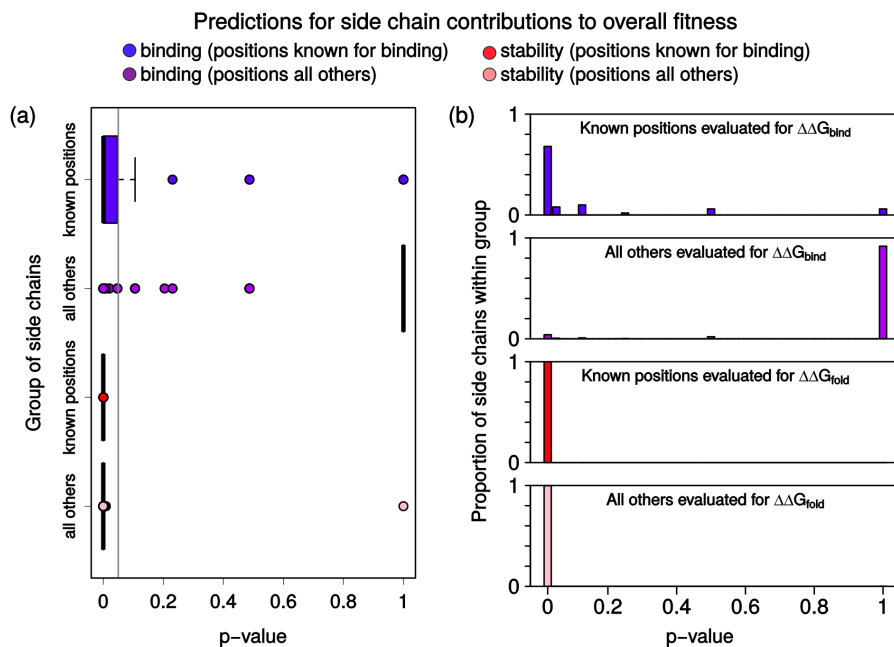

**Figure S25:** Positions known for binding interactions were separated from all other positions, then mutational differences based on  $\Delta\Delta G_{bind}$  and  $\Delta\Delta G_{fold}$  were computed (blue and red, respectively.) The analysis was applied to all other positions based on  $\Delta\Delta G_{bind}$  and  $\Delta\Delta G_{fold}$  (purple and pink, respectively) for comparison. These data are shown as distributions in (a) box-and-whiskers plots and (b) as a histogram to illustrate how the majority of side chains within each subgroup shifts as the premise for analysis changes.

**Table S10:** The positions known to have binding interactions according to Wall, *et al.* are provided here. The computed  $p$ -values are the untruncated output from R and based on  $\Delta\Delta G_{bind}$  energetic differences from wild type.

| Position | $p$ -value   | Position | $p$ -value   |
|----------|--------------|----------|--------------|
| A12A     | 1.453066e-04 | B52R     | 3.046867e-10 |
| A13V     | 0.4871795    | B55L     | 3.276003e-03 |
| A15R     | 1.541715e-07 | B57K     | 3.046867e-10 |
| A16S     | 4.509515e-05 | B59Y     | 4.712405e-02 |
| A19I     | 1.288433e-05 | B75Q     | 2.019602e-02 |
| A20D     | 3.351553e-09 | B78K     | 3.046867e-10 |
| A23L     | 4.359198e-04 | B80I     | 1.288433e-05 |
| A24R     | 0.4871795    | B88N     | 2.019602e-02 |
| A26D     | 4.509515e-05 | B89K     | 3.046867e-10 |
| A182T    | 0.1060291    | B90V     | 0.1060291    |
| A184I    | 4.359198e-04 | B91e     | 4.712405e-02 |
| A186E    | 3.351553e-09 | B99W     | 7.708573e-07 |
| A199F    | 4.712405e-02 | B101M    | 0.1060291    |
| A204Q    | 4.359198e-04 | B117L    | 2.569524e-08 |
| A206S    | 4.359198e-04 | B119N    | 1.453066e-04 |
| A207E    | 2.569524e-08 | B132N    | 1.0000000    |
| A209K    | 0.2307692    | B143T    | 1.0000000    |
| A210K    | 1.453066e-04 | B145Y    | 2.019602e-02 |
| A211W    | 1.228501e-03 | B186D    | 3.276003e-03 |
| A213e    | 4.509515e-05 | B188M    | 0.4871795    |
| A214C    | 3.276003e-03 | B204C    | 4.359198e-04 |
| A215F    | 0.1060291    | B228D    | 0.1060291    |
| A216E    | 8.316008e-03 | B230N    | 4.712405e-02 |
| A258W    | 3.046867e-10 | B246D    | 3.276003e-03 |
|          |              | B332W    | 3.340382e-06 |

**Table S11:** Using  $\Delta\Delta G_{bind}$  data, these positions were predicted to be at the binding interfaces of the heterotrimer. Values are untruncated R output.

| Position | <i>p</i> -value | Position | <i>p</i> -value |
|----------|-----------------|----------|-----------------|
| A6S      | 3.276003e-03    | B54p     | 2.569524e-08    |
| A8E      | 1.288433e-05    | B56A     | 2.019602e-02    |
| A9D      | 2.569524e-08    | B68R     | 3.351553e-09    |
| A17K     | 2.019602e-02    | B74S     | 3.276003e-03    |
| A21R     | 2.569524e-08    | B76D     | 2.019602e-02    |
| A29K     | 4.712405e-02    | B83D     | 4.712405e-02    |
| A30A     | 8.316008e-03    | B84S     | 4.359198e-04    |
| A35K     | 3.340382e-06    | B85Y     | 4.712405e-02    |
| A197K    | 3.276003e-03    | B86T     | 4.359198e-04    |
| A218V    | 4.359198e-04    | B92A     | 1.453066e-04    |
|          |                 | B97S     | 1.453066e-04    |
|          |                 | B98S     | 4.712405e-02    |
|          |                 | B118D    | 7.708573e-07    |
|          |                 | B120I    | 8.316008e-03    |
|          |                 | B129R    | 1.288433e-05    |
|          |                 | B147S    | 4.509515e-05    |
|          |                 | B274T    | 1.453066e-04    |
|          |                 | B313N    | 1.228501e-03    |
|          |                 | B314R    | 7.708573e-07    |
|          |                 | B316S    | 1.453066e-04    |
